# Supplementary material for: Camden active spaces: Does the construction of active school playgrounds influence children's physical activity levels? A longitudinal quasi-experiment protocol
Source: PubMed Central journal article supplement — BMJ Open. 2014 Aug 13;4(8):e005729. doi: 10.1136/bmjopen-2014-005729 (PMC4139631; doi:10.1136/bmjopen-2014-005729), 2014-08-13
Supplement: bmjopen-2014-005729.draft_revisions.pdf [file bmjopen-2014-005729.draft_revisions.pdf]

# BMJ Open

## Camden Active Spaces: Does the Construction of Active School Playgrounds Influence Children's Physical Activity Levels? A Longitudinal Quasi-Experiment Protocol

|                                 |                                                                                                                                                                                                                                                                                                                                                                                                                                                                                                                                                         |
|---------------------------------|---------------------------------------------------------------------------------------------------------------------------------------------------------------------------------------------------------------------------------------------------------------------------------------------------------------------------------------------------------------------------------------------------------------------------------------------------------------------------------------------------------------------------------------------------------|
| Journal:                        | <i>BMJ Open</i>                                                                                                                                                                                                                                                                                                                                                                                                                                                                                                                                         |
| Manuscript ID:                  | bmjopen-2014-005729                                                                                                                                                                                                                                                                                                                                                                                                                                                                                                                                     |
| Article Type:                   | Protocol                                                                                                                                                                                                                                                                                                                                                                                                                                                                                                                                                |
| Date Submitted by the Author:   | 19-May-2014                                                                                                                                                                                                                                                                                                                                                                                                                                                                                                                                             |
| Complete List of Authors:       | Smith, Lee; University College London, Epidemiology and Public Health<br>Kipps, Courtney; University College London Hospital, Institute of Sport, Exercise and Health<br>Aggio, Daniel; University College London, Epidemiology and Public Health<br>Fox, Paul; Camden Borough Council,<br>Robinson, Nigel; Camden Borough Council,<br>Trend, Verena; Camden Borough Council,<br>Munnery, Suzie; Camden Borough Council,<br>Kelly, Barry; Camden and Islington Public Health,<br>Hamer, Mark; University College London, Epidemiology and Public Health |
| <b>Primary Subject Heading</b>: | Public health                                                                                                                                                                                                                                                                                                                                                                                                                                                                                                                                           |
| Secondary Subject Heading:      | Paediatrics                                                                                                                                                                                                                                                                                                                                                                                                                                                                                                                                             |
| Keywords:                       | PREVENTIVE MEDICINE, PUBLIC HEALTH, SPORTS MEDICINE                                                                                                                                                                                                                                                                                                                                                                                                                                                                                                     |
|                                 |                                                                                                                                                                                                                                                                                                                                                                                                                                                                                                                                                         |

SCHOLARONE™  
Manuscripts

only

1  
2  
3 1 **Camden Active Spaces: Does the Construction of Active School Playgrounds Influence**  
4  
5 2 **Children's Physical Activity Levels? A Longitudinal Quasi-Experiment Protocol**  
6  
7  
8  
9 3

10  
11 4 Lee Smith\*, Health Behaviour Research Centre, Department of Epidemiology and Public

12 Health, University College London, London, UK, WC1E 6BT; [lee.smith@ucl.ac.uk](mailto:lee.smith@ucl.ac.uk); 020 7679

13  
14  
15 6 1812

16  
17  
18 7 Courtney Kipps, Institute Sport Exercise and Health, University College London Hospital,

19  
20  
21 8 London, UK

22  
23  
24 9 Daniel Aggio, Physical Activity Research Group, Department of Epidemiology and Public

25  
26  
27 10 Health, London, UK

28  
29  
30 11 Paul Fox, Camden Borough Council, London, UK

31  
32  
33 12 Nigel Robinson, Camden Borough Council, London, UK

34  
35  
36 13 Verena Trend, Camden Borough Council, London, UK

37  
38  
39 14 Suzie Munnery, Camden Borough Council, London, Uk

40  
41  
42 15 Barry Kelly, Camden and Islington Public Health, London, Uk

43  
44  
45 16 Mark Hamer, Physical Activity Research Group, Department of Epidemiology and Public

46  
47  
48 17 Health, London, UK

49  
50  
51 18 \*Corresponding author

52  
53  
54 19 **Key words: physical activity/ active play/ children/ school/ environment**  
55  
56  
57  
58  
59  
60

1  
2  
3  
4  
5  
6  
7  
8  
9  
10  
11  
12  
13  
14  
15  
16  
17  
18  
19  
20  
21  
22  
23  
24  
25  
26  
27  
28  
29  
30  
31  
32  
33  
34  
35  
36  
37  
38  
39  
40  
41  
42  
43  
44  
45  
46  
47  
48  
49  
50  
51  
52  
53  
54  
55  
56  
57  
58  
59  
60

20 **Word count: 2317**

21

22

23

24

25

26

27

28

29

30

31

32

33

34

35

36

37

For peer review only

1  
2  
3 38 **INTRODUCTION**  
4  
5

6 39 Physical activity is essential for every facet of children's health. However, physical activity  
7  
8 40 levels in British children are low. The school environment is a promising setting to increase  
9  
10 41 children's physical activity but limited empirical evidence exists on how a change in the  
11  
12 42 outdoor physical school environment influences physical activity behaviour. London  
13  
14 43 Borough of Camden is re-designing seven existing school playgrounds to engage children to  
15  
16 44 become more physically active. The primary aim of this project is to evaluate how the use of  
17  
18 45 bespoke and innovative design of 'space' can influence physical activity levels in young  
19  
20 46 people.  
21  
22  
23  
24  
25  
26  
27  
28

29 48 **METHOD AND ANALYSIS**  
30  
31

32 49 This project will use a longitudinal quasi-experimental design with one baseline data  
33  
34 50 collection session and two follow-ups. Between baseline and follow-up the school  
35  
36 51 playgrounds will be re-designed. At baseline, a series of fitness tests, anthropometric and  
37  
38 52 questionnaire measurements, and 7 day objective physical activity monitoring will be  
39  
40 53 carried out on children. This will be repeated at follow-up. Multilevel regression modelling  
41  
42 54 will be used to analyse the data.  
43  
44  
45  
46  
47  
48  
49  
50  
51  
52  
53  
54  
55  
56  
57  
58  
59  
60

1  
2  
3 59 **ETHICS AND DISSEMINATION**  
4

5  
6 60 The results of this study will be disseminated through peer-review publications and scientific  
7  
8 61 presentations. Ethical approval was obtained through the University College London  
9  
10 62 Research Ethics Committee (Reference number: 4400/002).  
11  
12  
13  
14 63  
15  
16  
17 64  
18  
19  
20 65  
21  
22  
23 66  
24  
25  
26 67  
27  
28  
29 68  
30  
31  
32 69  
33  
34  
35 70  
36  
37  
38 71  
39  
40  
41 72  
42  
43  
44 73  
45  
46  
47 74  
48  
49  
50 75  
51  
52  
53 76  
54  
55  
56  
57  
58  
59  
60

For peer review only

1  
2  
3 77 **Strengths and Limitations of this Study**  
4  
5

6 78 • Camden Active Spaces presents a unique opportunity to evaluate the impact of the  
7  
8 79 construction of school “active playgrounds” on children’s physical activity, health,  
9  
10 80 and wellbeing.

11  
12  
13 81 • The use of objective measures of physical activity over seven consecutive days is  
14  
15 82 strength of the present study.

16  
17  
18 83 • The present study uses a longitudinal quasi-experimental design without control  
19  
20 84 groups.  
21  
22

23 85  
24  
25  
26  
27 86  
28  
29  
30 87  
31  
32  
33 88  
34  
35  
36 89  
37  
38  
39 90  
40  
41  
42 91  
43  
44  
45 92  
46  
47  
48 93  
49  
50  
51 94  
52  
53  
54  
55 95  
56  
57  
58  
59  
60

1  
2  
3 96 **INTRODUCTION**  
4  
5

6 97 Physical activity is essential for every facet of children's (aged 5 to 16 years) health. For  
7  
8 98 example, higher levels of physical activity in children are associated with more favourable  
9  
10 99 cardiovascular disease risk factors whereas excessive levels of sedentary behaviour have the  
11  
12 100 reverse effect.[1,2] Physical activity can also benefit psychological health by aiding in the  
13  
14 101 prevention of anxiety and depressive symptoms and contributing to the improvement of  
15  
16 102 self-esteem.[3] Importantly, rather than detracting from learning, more physical activity and  
17  
18 103 breaks from sitting in school are thought to enhance cognitive function and academic  
19  
20 104 performance.[4] It is also more likely that active children will become active adults, since  
21  
22 105 some tracking of physical activity behaviour has been observed from childhood to  
23  
24 106 adulthood.[5] However, in westernised countries current levels of physical activity in  
25  
26 107 children are low as there are increasing opportunities to participate in sedentary  
27  
28 108 activities.[6,7] For example, it is recommended that children engage in physical activity of  
29  
30 109 moderate intensity for at least one hour a day, to maintain good health.[8] However, just  
31  
32 110 24% of British girls and 32% of boys achieve this recommendation.[7] Physical inactivity is  
33  
34 111 estimated to cost the NHS approximately £8 billion per year in health care costs alone.[8]  
35  
36 112 Encouraging physically active lifestyles in children is therefore crucial in nurturing a healthy  
37  
38 113 future generation of adults.  
39  
40  
41  
42  
43  
44  
45  
46

47 114 A recent meta-analysis found that the effects of interventions to increase physical activity in  
48  
49 115 children have been, at best, modest, and concluded that alternative approaches are  
50  
51 116 required.[9] Children spend approximately 60% of their weekday in school where physical  
52  
53 117 activity levels are at their lowest.[10,11] Therefore, the school environment is a promising  
54  
55 118 setting for intervention. The majority of school-based interventions have focused on  
56  
57  
58  
59  
60

1  
2  
3 119 physical education (delivered once or twice a week) and have found only small effects.[12]  
4  
5 120 Environments both facilitate and provide the arena for physical activity [13] although there  
6  
7 121 is little robust empirical evidence concerning the effect of changing the physical  
8  
9 122 environment on activity levels in children. Emerging data has suggested that a positive  
10  
11 123 perception of the school play environment was associated with higher levels of moderate-  
12  
13 124 vigorous physical activity (MVPA) during playtime.[14] In a 12 month intervention where the  
14  
15 125 playground environment was redesigned with markings and physical structures, children's  
16  
17 126 morning and lunchtime activity levels were increased 6 months post-intervention, although  
18  
19 127 effects were not sustained at 12 months.[15] Previous studies have collected physical  
20  
21 128 activity data during one school day only therefore it is questionable whether this data is  
22  
23 129 reflective of habitual behaviour and so limits the ability to examine carry over effects  
24  
25 130 outside the school environment (ie, at weekends and during evenings). Taken together, the  
26  
27 131 emerging evidence suggests that the physical environment could play an important role in  
28  
29 132 children's physical activity behaviour, but more robust evidence is required.  
30  
31  
32  
33  
34  
35  
36  
37  
38  
39

#### 40 **SETTING**

41  
42  
43 135 Camden Borough Council is re-designing seven existing school playgrounds (five primary  
44  
45 136 schools and two secondary schools), that are thought *not* to be conducive to physical  
46  
47 137 activity/ active play, with exciting bespoke features to engage children to become more  
48  
49 138 active. Example features include climbing frames, trampolines, monkey bars, and outdoor  
50  
51 139 gyms, which have been designed based on themes emerging from qualitative work in each  
52  
53 140 school. Camden Council's underlying goal is to encourage participation by creating  
54  
55 141 opportunities for physical activity outside of traditional sports or team competition. This  
56  
57  
58  
59  
60



1  
2  
3 142 presents a unique opportunity to evaluate the impact of these structures on children's  
4  
5 143 physical activity, health and wellbeing outcomes while addressing previous limitations in the  
6  
7 144 literature (ie collecting activity data for a period >1day).  
8  
9  
10  
11 145

## 14 146 **AIMS**

17 147 The *Camden Active Spaces* project encompasses two key elements; 1) redesign of the school  
18  
19 148 playgrounds; 2) evaluation of the hypothesised benefits. In the present paper we focus on  
20  
21 149 the evaluation only. Thus, the primary aim of this project is to evaluate the impact of the re-  
22  
23 150 designed playgrounds on children's physical activity, wellbeing, engagement, and physical  
24  
25 151 function/fitness.  
26  
27  
28  
29  
30 152

## 33 153 **METHOD AND ANALYSES**

36 154 The evaluation of *Camden Active Spaces* will use a longitudinal quasi-experimental design.  
37  
38 155 Baseline data collection will take place in the Spring/Summer term 2014, follow-up I data  
39  
40 156 collection will take place during the Autumn term 2014, and follow-up II during the Summer  
41  
42 157 term of 2015 (see Figure 1). Between baseline and follow-up I (school summer holidays) the  
43  
44 158 school playgrounds will be re-designed. A second follow-up will allow us to investigate if  
45  
46 159 short-term effects of the intervention (if they exist) are sustained over a longer period. This  
47  
48 160 evaluation has been funded by the Economic and Social Research Council, UK  
49  
50 161 (ES/M003795/1), whilst the core project (playground redesign) has been funded by Camden  
51  
52 162 Clinical Commissioning Group and London Borough of Camden. Ethical approval was  
53  
54 163 granted by the University College London Research Ethics Committee (4400/002).  
55  
56  
57  
58  
59  
60

1  
2  
3 164  
4  
5

6 165 **Inclusion criteria**  
7  
8

9 166 *School inclusion criteria*  
10  
11

12 167 Seven schools located in the London Borough of Camden have been selected to receive the  
13  
14 168 re-designed playgrounds and all seven schools have agreed to take part in the study.  
15  
16

17  
18 169  
19

20  
21 170 *Participant Inclusion criteria*  
22  
23

24 171 We aim to randomly select approximately 100 children (see below power calculation) evenly  
25  
26 172 distributed across school year groups (aged 5 to 11 years in primary school and aged 11 to  
27  
28 173 16 years in secondary school) from each of the seven schools (total sample size 700).  
29

30  
31 174 Children aged 17 to 18 years or any school leavers in 2014 will not be asked to participate in  
32  
33 175 the current project, owing to time table restrictions due to final exams and potential loss to  
34  
35 176 follow up. Students whose parents have not opted them out of the study will be eligible to  
36  
37 177 participate (see section Ethics and Dissemination for details on obtaining consent).  
38  
39

40  
41 178  
42  
43

44  
45 179 **Recruitment**  
46  
47

48 180 The seven schools who will be receiving the redesigned playgrounds have previously been  
49  
50 181 recruited into the study. To recruit children into the study presentations will be given to  
51  
52 182 each year group within each school, during assemblies. The presentations will disseminate  
53  
54 183 information on *Camden Active Spaces*, what would be involved if children were to take part  
55  
56 184 in the study and benefits of the study to children and the school. At the end of the  
57  
58  
59  
60

1  
2  
3 185 presentations children will be given participant study information sheets. In order to make  
4  
5 186 parents aware of the study a parent information sheet will be emailed to all parents  
6  
7 187 (translated into different languages where required), posted on the school webpage, in  
8  
9  
10 188 addition to hard copies being made available at the school. In an attempt to maximise  
11  
12 189 response rates and adherence to protocol, each child who completes the wear protocol will  
13  
14 190 be awarded a one-month free swimming voucher and entered into a prize draw to win an  
15  
16 191 iPod Touch (one iPod Touch will be awarded per school). All schools taking part in the study  
17  
18 192 will be entered into a separate prize draw to win one of two Nintendo Wiis.  
19  
20  
21  
22  
23  
24  
25

#### 26 194 **Procedures**

27  
28  
29 195 Data collection procedures will take place over a period of 18 months. A team of trained  
30  
31 196 researchers will collect data from each school on a date and time that is convenient for the  
32  
33 197 school. Children will be invited to take part in data collection. Data collection sessions will  
34  
35 198 last approximately 30 minutes. A series of fitness tests and anthropometric measurements  
36  
37 199 will be carried out on children, in an appropriate room in the school (e.g. sports or assembly  
38  
39 200 hall). Once fitness tests and anthropometric measurements have been completed objective  
40  
41 201 devices (accelerometers) will be given to children to monitor their physical activity  
42  
43 202 behaviour. Between four and seven days of accelerometer data are needed to provide a  
44  
45 203 reliable estimate of habitual physical activity.[16] Thus participants will be asked to wear  
46  
47 204 accelerometers for 7 consecutive days. On day seven participants will return the device to  
48  
49 205 research staff at the school where they will then complete a questionnaire on their physical  
50  
51 206 activity behaviour. This exact process will be repeated at follow-up I and follow-up II.  
52  
53  
54  
55  
56  
57  
58  
59  
60

207

208 **Measurement and instruments**209 *Accelerometer*

210 It is now recognised that accelerometers provide the most reliable and valid measurement  
211 of activity in children [17] and are considered the gold standard approach. These wearable  
212 motion sensors measure movement across three dimensions, thus providing minute-by-  
213 minute time-stamped data on activity intensity, duration, and patterns across the day.

214 Objective physical activity monitoring has been successfully used in similar study settings to  
215 the present project.[14,15,17,18]

216 The present evaluation will use the Actigraph GT3X accelerometer. This device is validated  
217 and has been used in other studies with primary and high school children (see for example:  
218 [www.iconnect.co.uk](http://www.iconnect.co.uk) and <http://www.cedar.iph.cam.ac.uk/research/directory/speedy/>). The

219 Actigraph GT3X is worn on a belt around the waist with the device itself positioned above  
220 the right hip either over or under clothing. Children will be asked to wear the device during  
221 waking hours every day for seven consecutive days, but not during water-based activities or  
222 sleep.

223

224 *Fitness Tests*

225 A series of fitness tests will be carried out, following Standard Operating Procedure Forms,  
226 on all children taking part in the study. Four fitness tests will be carried out to measure  
227 aspects of general fitness: participants will be asked to perform the hand held

1  
2  
3 228 Dynamometer test to assess grip strength, the standing horizontal jump test to assess leg  
4  
5 229 power, the peak flow test to assess lung function, and the sit-and-reach test to assess  
6  
7 230 flexibility. Participants' weight and body composition will be measured using the Tanita SC-  
8  
9 231 330 Body Composition Analyser (Tanita Inc, IL, USA) and height will be measured using the  
10  
11 232 Leicester Height Measure, from which BMI will be calculated  $\text{kg/m}^2$ .  
12  
13  
14  
15  
16  
17  
18  
19

20  
21  
22  
23  
24  
25  
26  
27  
28  
29  
30  
31  
32  
33  
34  
35  
36  
37  
38  
39  
40  
41  
42  
43  
44  
45  
46  
47  
48  
49  
50  
51  
52  
53  
54  
55  
56  
57  
58  
59  
60

234 *Questionnaires*

235 All children taking part in the study will be asked to complete a questionnaire. The  
236 questionnaire will take approximately ten minutes to complete and includes questions on  
237 standard demographics and physical activity, as well as potentially important correlates of  
238 physical activity.

239 The Girls Health Enrichment Multi-Studies (GEMS) physical activity survey has been  
240 embedded within the questionnaire to give a subjective measure of physical activity. GEMS  
241 has validity and reliability equivalent to other self-report measures of physical activity [19]  
242 and was deemed suitable for both primary and high school boys and girls by those who  
243 designed the present study, owing to its simplicity.

244 The questionnaire also includes items on travel mode (as used in the iConnect Study;  
245 [www.iconnect.co.uk](http://www.iconnect.co.uk)), diet, parents health (as used in the DASH study;  
246 <http://dash.sphsu.mrc.ac.uk/>), and health related quality of life (Child Health Utility 9D;[20]  
247 to allow for a cost evaluation of the project).

248 Teachers will be asked to complete the validated Strengths and Difficulties  
249 questionnaire;[21] this questionnaire provides a measure of children's behaviour and

1  
2  
3 250 mental health and takes approximately five minutes to complete per child. Head Teachers  
4  
5 251 will also be asked to complete a questionnaire to allow for an understanding of differences  
6  
7 252 between schools on “playground policy.” Example questions include, “If it is raining are  
8  
9  
10 253 children allowed to go outside and play?” And “How long do schools provide for recess?”  
11  
12

13 254

## 16 255 **ANALYSIS**

### 19 256 *Outcome*

22 257 The primary outcome for this study will be change in average daily time spent in MVPA as  
23  
24 258 recorded by the Actigraph accelerometer. In addition the study has been designed to collect  
25  
26 259 the following secondary outcomes using participant questionnaires and objective measures  
27  
28 260 (1) change in average daily time spent sedentary, (2) change in average daily time spent in  
29  
30 261 light and vigorous activity at different times of the day (playtimes at school, leisure time at  
31  
32 262 home), (3) change in peak flow, sit-and-reach, grip strength, standing horizontal jump, and  
33  
34 263 body mass index (BMI)/body composition, (4) change in other intra-personal variables  
35  
36 264 recorded by questionnaires (e.g. Strength and Difficulties scores).  
37  
38  
39  
40  
41  
42  
43  
44  
45  
46  
47  
48  
49  
50  
51  
52  
53  
54  
55  
56  
57  
58  
59  
60

265

### 266 266 *Quantitative analysis*

267 267 Raw data files will be extracted from each Actigraph device and processed using bespoke  
268 268 software (Actilife) to quantify a range of features that will directly contribute to the  
269 269 determination of active and sedentary time. Standard criteria will be employed in the  
270 270 analysis and cleaning of accelerometry data, including the use of conventional guidelines to

1  
2  
3 271 identify minimum wear time, differentiate non-wear time from prolonged periods of  
4  
5 272 inactivity, and selecting valid cut-points for the identification of different activity intensity  
6  
7  
8 273 bands. Multilevel modelling will be used to analyse the data. This approach offers several  
9  
10 274 advantages over simple regression models. We will be able to model changes in activity over  
11  
12 275 the three assessment periods accounting for the inter-individual as well as intra-individual  
13  
14 276 differences.  
15  
16  
17  
18 277  
19  
20  
21 278 *Sample size*  
22  
23

24 279 A previous school based intervention to examine the effects of changes in playground  
25  
26 280 structure on physical activity [17] demonstrated a small effect size ( $d = 0.10$ ). Thus, based on  
27  
28 281 these data, a sample size of  $N=458$  would provide us with 80% power at 5% significance  
29  
30 282 level to detect small differences in moderate intensity physical activity using a repeated  
31  
32 283 measures design (calculated using G-Power). We will aim to recruit 100 children from each  
33  
34 284 school to allow for dropout and incomplete Actigraph data.  
35  
36  
37  
38  
39  
40  
41  
42

## 43 286 **ETHICAL CONSIDERATION AND DISSEMINATION**

44  
45  
46 287 Firstly, head teachers from each school will be asked to provide explicit written consent for  
47  
48 288 their schools and school children to take part in the study. Next, if parents do not want their  
49  
50 289 child(ren) to take part in the study they will be given the option to “opt-out” their child(ren),  
51  
52 290 instructions to parents on how to opt-out their child(ren) are provided in the parent study  
53  
54 291 information sheet. Prior to data collection all high school (not primary school) children will  
55  
56 292 be asked to provide explicit written assent.  
57  
58  
59  
60

1  
2  
3 293 The findings from this study will be disseminated to academic researchers and to  
4  
5 294 policymakers through several mechanisms. First, we will employ the usual avenues for  
6  
7 295 dissemination of academic research, including conference presentations and journal  
8  
9 296 articles. Second, we will disseminate this research via social media outlets such as the  
10  
11 297 University College London – Physical Activity Research Group Twitter account. Third, with  
12  
13 298 Camden Council, we will include this physical activity study within the regular programme of  
14  
15 299 briefings that are presented to government departments interested in physical activity,  
16  
17 300 including the Department of Health, the Department for Communities and Local  
18  
19 301 Government, etc.  
20  
21  
22  
23  
24  
25  
26  
27

### 28 303 **Competing interests**

29  
30  
31 304 The authors declare that they have no competing interests.  
32  
33

### 34 305 **Funding**

35  
36  
37 306 This work was supported by The Economic and Social Research Council, UK (ES/M003795/1)  
38  
39

### 40 307 **Authors' contributions**

41  
42  
43  
44 308 LS, CK, and MH designed the study. All authors contributed to the development of the study  
45  
46 309 protocol. LS and MH drafted the manuscript. All authors assisted in drafting the manuscript.  
47  
48 310 All authors read and approved the final manuscript.  
49  
50

51 311  
52  
53  
54

55 312  
56  
57  
58  
59  
60



## 313 REFERENCES

- 314 1. Strong WB, Malina RM, Blimkie CJR, et al. Evidence based physical activity for school-age youth. *J*  
315 *Pediatr* 2005;146(6):732-37.
- 316 2. Ekelund U, Luan JA, Sherar LB, et al. Moderate to Vigorous Physical Activity and Sedentary Time  
317 and Cardiometabolic Risk Factors in Children and Adolescents. *JAMA* 2012;307(7):704-12.
- 318 3. Centre for Diseases and Control Prevention. Physical Activity and Health. Atlanta, US.  
319 2013.
- 320 4. Lees C, Hopkins J. Effect of Aerobic Exercise on Cognition, Academic Achievement, and  
321 Psychosocial Function in Children: A Systematic Review of Randomized Control Trials. *PCD*  
322 2013;10.
- 323 5. Telama R, Yang X, Viikari J, et al. Physical activity from childhood to adulthood: a 21-year tracking  
324 study. *Am Jr Pev Med* 2005;28(3):267-73.
- 325 6. Griffiths LJ, Cortina-Borja M, Sera F, et al. How active are our children? Findings from the  
326 Millennium Cohort Study. *BMJ open* 2013;3(8).
- 327 7. Joint Health Surveys Unit. The Health Survey for England 2008. The Information Centre for Health  
328 and Social Care, 2009, Leeds. [www.ic.nhs.uk/pubs/hse08physicalactivity](http://www.ic.nhs.uk/pubs/hse08physicalactivity)
- 329 8. Department of Health. Start Active Stay Active: A report on physical activity for health from the  
330 four home countries' Chief Medical Officers (UK). July 2011.
- 331 9. Metcalf B, Henley W, Wilkin T. Effectiveness of intervention on physical activity of children:  
332 systematic review and meta-analysis of controlled trials with objectively measured  
333 outcomes. *Br J Sports Med* 2013;47(4):226-26.
- 334 10. Smith L, Sahlqvist S, Ogilvie D, et al. Is active travel to non-school destinations associated with  
335 physical activity in primary school children? *Prev Med* 2012;54(3-4):224-28.
- 336 11. Nettlefold L, Mckay HA, Warburton DER. The challenge of low physical activity during the school  
337 day: at recess, lunch and in physical education. *Br J Sports Med* 2011;45(10):819-19.
- 338 12. van Sluijs EM, McMinn AM, Griffin SJ. Effectiveness of interventions to promote physical activity  
339 in children and adolescents: systematic review of controlled trials. *BMJ* 2007;335(7622):703.
- 340 13. Fisher A, van Jaarsveld CHM, Llewellyn CH, et al. Environmental Influences on Children's Physical  
341 Activity: Quantitative Estimates Using a Twin Design. *PloS one* 2010;5(4).
- 342 14. Yildirim M, Arundell L, Cerin E, Carson V, Brown H, Crawford D, et al. What helps children to  
343 move more at school recess and lunchtime? Mid-intervention results from Transform-Us!  
344 cluster-randomised controlled trial. *Br J Sports Med* 2014;48(3):271-77.
- 345 15. Ridgers ND, Fairclough SJ, Stratton G. Twelve-month effects of a playground intervention on  
346 children's morning and lunchtime recess physical activity levels. *J Phys Act Health*  
347 2010;7(2):167-75.
- 348 16. Corder K, Brage S, Ekelund U. Accelerometers and pedometers: methodology and clinical  
349 application. *Curr Opin Clin Nutr* 2007;10(5):597-603.
- 350 17. Blaes A, Ridgers ND, Aucouturier J, et al. Effects of a playground marking intervention on school  
351 recess physical activity in French children. *Prev Med* 2013;57(5):580-4.
- 352 18. Smith L, Sahlqvist S, Ogilvie D, et al. Is a change in mode of travel to school associated with a  
353 change in overall physical activity levels in children? Longitudinal results from the SPEEDY  
354 study. *Int J Behav Nutr Phy* 2012;9.
- 355 19. Treuth MS, Sherwood NE, Butte NF, et al. Validity and reliability of activity measures in African-  
356 American girls for GEMS. *Med Sci Sports Exerc* 2003;35(3):532-9.
- 357 20. Stevens K. Valuation of the Child Health Utility 9D Index. *Pharmacoeconomics* 2012;30(8):729-47.
- 358 21. Goodman R. Psychometric properties of the strengths and difficulties questionnaire. *J Am Acad*  
359 *Child Adolesc Psychiatry* 2001;40(11):1337-45.

360

1  
2  
3 361  
4  
5  
6 362  
7  
8  
9  
10  
11  
12  
13  
14  
15  
16  
17  
18  
19  
20  
21  
22  
23  
24  
25  
26  
27  
28  
29  
30  
31  
32  
33  
34  
35  
36  
37  
38  
39  
40  
41  
42  
43  
44  
45  
46  
47  
48  
49  
50  
51  
52  
53  
54  
55  
56  
57  
58  
59  
60

For peer review only

Figure one: Overview of Study Design

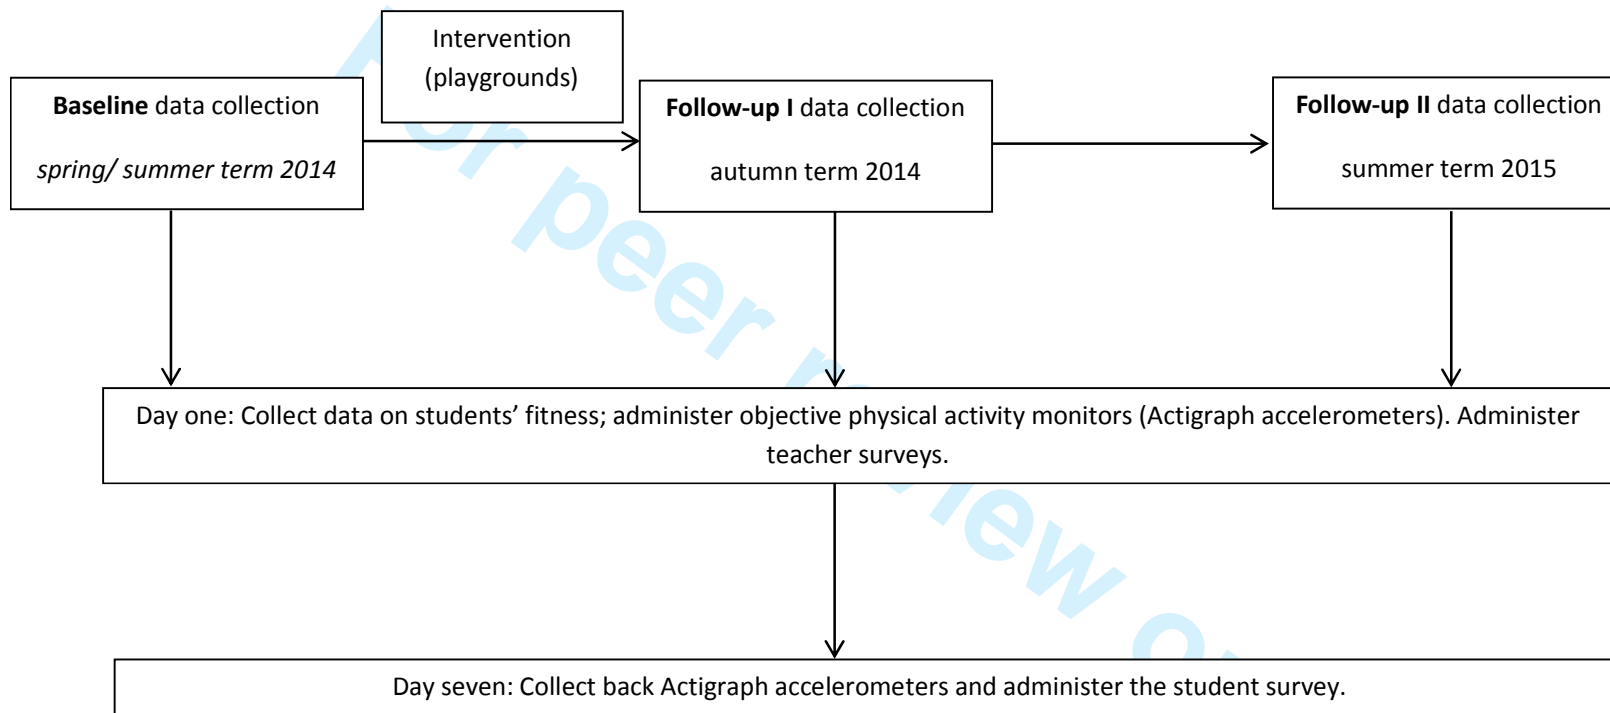

## STROBE Statement—checklist of items that should be included in reports of observational studies

|                              | Item No | Recommendation                                                                                                                                                                                                                                                                                                                    |
|------------------------------|---------|-----------------------------------------------------------------------------------------------------------------------------------------------------------------------------------------------------------------------------------------------------------------------------------------------------------------------------------|
| Title and abstract           | 1       | (a) Indicate the study's design with a commonly used term in the title or the abstract<br><b>YES</b>                                                                                                                                                                                                                              |
|                              |         | (b) Provide in the abstract an informative and balanced summary of what was done and what was found<br><b>YES</b>                                                                                                                                                                                                                 |
| <b>Introduction</b>          |         |                                                                                                                                                                                                                                                                                                                                   |
| Background/rationale         | 2       | Explain the scientific background and rationale for the investigation being reported<br><b>YES</b>                                                                                                                                                                                                                                |
| Objectives                   | 3       | State specific objectives, including any prespecified hypotheses<br><b>YES</b>                                                                                                                                                                                                                                                    |
| <b>Methods</b>               |         |                                                                                                                                                                                                                                                                                                                                   |
| Study design                 | 4       | Present key elements of study design early in the paper<br><b>YES</b>                                                                                                                                                                                                                                                             |
| Setting                      | 5       | Describe the setting, locations, and relevant dates, including periods of recruitment, exposure, follow-up, and data collection<br><b>YES</b>                                                                                                                                                                                     |
| Participants                 | 6       | (a) <i>Cohort study</i> —Give the eligibility criteria, and the sources and methods of selection of participants. Describe methods of follow-up<br><b>YES</b>                                                                                                                                                                     |
|                              |         | <i>Case-control study</i> —Give the eligibility criteria, and the sources and methods of case ascertainment and control selection. Give the rationale for the choice of cases and controls<br><i>Cross-sectional study</i> —Give the eligibility criteria, and the sources and methods of selection of participants<br><b>YES</b> |
| Variables                    | 7       | (b) <i>Cohort study</i> —For matched studies, give matching criteria and number of exposed and unexposed<br><i>Case-control study</i> —For matched studies, give matching criteria and the number of controls per case<br><b>NA</b>                                                                                               |
|                              |         | Clearly define all outcomes, exposures, predictors, potential confounders, and effect modifiers. Give diagnostic criteria, if applicable<br><b>YES</b>                                                                                                                                                                            |
| Data sources/<br>measurement | 8*      | For each variable of interest, give sources of data and details of methods of assessment (measurement). Describe comparability of assessment methods if there is more than one group<br><b>YES</b>                                                                                                                                |
| Bias                         | 9       | Describe any efforts to address potential sources of bias<br><b>YES</b>                                                                                                                                                                                                                                                           |
| Study size                   | 10      | Explain how the study size was arrived at<br><b>YES</b>                                                                                                                                                                                                                                                                           |
| Quantitative variables       | 11      | Explain how quantitative variables were handled in the analyses. If applicable, describe which groupings were chosen and why<br><b>YES</b>                                                                                                                                                                                        |

|    |                     |    |                                                                                            |
|----|---------------------|----|--------------------------------------------------------------------------------------------|
| 1  |                     |    |                                                                                            |
| 2  |                     |    |                                                                                            |
| 3  | Statistical methods | 12 | (a) Describe all statistical methods, including those used to control for confounding      |
| 4  |                     |    | <b>YES</b>                                                                                 |
| 5  |                     |    | _____                                                                                      |
| 6  |                     |    | (b) Describe any methods used to examine subgroups and interactions                        |
| 7  |                     |    | <b>NA</b>                                                                                  |
| 8  |                     |    | _____                                                                                      |
| 9  |                     |    | (c) Explain how missing data were addressed                                                |
| 10 |                     |    | <b>NA</b>                                                                                  |
| 11 |                     |    | _____                                                                                      |
| 12 |                     |    | (d) <i>Cohort study</i> —If applicable, explain how loss to follow-up was addressed        |
| 13 |                     |    | <i>Case-control study</i> —If applicable, explain how matching of cases and controls was   |
| 14 |                     |    | addressed                                                                                  |
| 15 |                     |    | <i>Cross-sectional study</i> —If applicable, describe analytical methods taking account of |
| 16 |                     |    | sampling strategy                                                                          |
| 17 |                     |    | <b>NA</b>                                                                                  |
| 18 |                     |    | _____                                                                                      |
| 19 |                     |    | (e) Describe any sensitivity analyses                                                      |

Continued on next page

For peer review only

1  
2  
3  
4  
5  
6  
7  
8  
9  
10  
11  
12  
13  
14  
15  
16  
17  
18  
19  
20  
21  
22  
23  
24  
25  
26  
27  
28  
29  
30  
31  
32  
33  
34  
35  
36  
37  
38  
39  
40  
41  
42  
43  
44  
45  
46  
47  
48  
49  
50  
51  
52  
53  
54  
55  
56  
57  
58  
59  
60

| <b>Results</b>    |     |                                                                                                                                                                                                              |
|-------------------|-----|--------------------------------------------------------------------------------------------------------------------------------------------------------------------------------------------------------------|
| Participants      | 13* | (a) Report numbers of individuals at each stage of study—eg numbers potentially eligible, examined for eligibility, confirmed eligible, included in the study, completing follow-up, and analysed            |
|                   |     | NA                                                                                                                                                                                                           |
|                   |     | (b) Give reasons for non-participation at each stage                                                                                                                                                         |
|                   |     | NA                                                                                                                                                                                                           |
|                   |     | (c) Consider use of a flow diagram                                                                                                                                                                           |
|                   |     | NA                                                                                                                                                                                                           |
| Descriptive data  | 14* | (a) Give characteristics of study participants (eg demographic, clinical, social) and information on exposures and potential confounders                                                                     |
|                   |     | NA                                                                                                                                                                                                           |
|                   |     | (b) Indicate number of participants with missing data for each variable of interest                                                                                                                          |
|                   |     | NA                                                                                                                                                                                                           |
|                   |     | (c) <i>Cohort study</i> —Summarise follow-up time (eg, average and total amount)                                                                                                                             |
|                   |     | YES                                                                                                                                                                                                          |
| Outcome data      | 15* | <i>Cohort study</i> —Report numbers of outcome events or summary measures over time                                                                                                                          |
|                   |     | NA                                                                                                                                                                                                           |
|                   |     | <i>Case-control study</i> —Report numbers in each exposure category, or summary measures of exposure                                                                                                         |
|                   |     | NA                                                                                                                                                                                                           |
|                   |     | <i>Cross-sectional study</i> —Report numbers of outcome events or summary measures                                                                                                                           |
|                   |     | NA                                                                                                                                                                                                           |
| Main results      | 16  | (a) Give unadjusted estimates and, if applicable, confounder-adjusted estimates and their precision (eg, 95% confidence interval). Make clear which confounders were adjusted for and why they were included |
|                   |     | NA                                                                                                                                                                                                           |
|                   |     | (b) Report category boundaries when continuous variables were categorized                                                                                                                                    |
|                   |     | NA                                                                                                                                                                                                           |
|                   |     | (c) If relevant, consider translating estimates of relative risk into absolute risk for a meaningful time period                                                                                             |
|                   |     | NA                                                                                                                                                                                                           |
| Other analyses    | 17  | Report other analyses done—eg analyses of subgroups and interactions, and sensitivity analyses                                                                                                               |
|                   |     | NA                                                                                                                                                                                                           |
| <b>Discussion</b> |     |                                                                                                                                                                                                              |
| Key results       | 18  | Summarise key results with reference to study objectives                                                                                                                                                     |
|                   |     | NA                                                                                                                                                                                                           |
| Limitations       | 19  | Discuss limitations of the study, taking into account sources of potential bias or imprecision. Discuss both direction and magnitude of any potential bias                                                   |
|                   |     | YES                                                                                                                                                                                                          |
| Interpretation    | 20  | Give a cautious overall interpretation of results considering objectives, limitations, multiplicity of analyses, results from similar studies, and other relevant evidence                                   |
|                   |     | NA                                                                                                                                                                                                           |
| Generalisability  | 21  | Discuss the generalisability (external validity) of the study results                                                                                                                                        |
|                   |     | NA                                                                                                                                                                                                           |

**Other information**

---

Funding 22 Give the source of funding and the role of the funders for the present study and, if applicable, for the original study on which the present article is based

**YES**

\*Give information separately for cases and controls in case-control studies and, if applicable, for exposed and unexposed groups in cohort and cross-sectional studies.

**Note:** An Explanation and Elaboration article discusses each checklist item and gives methodological background and published examples of transparent reporting. The STROBE checklist is best used in conjunction with this article (freely available on the Web sites of PLoS Medicine at <http://www.plosmedicine.org/>, Annals of Internal Medicine at <http://www.annals.org/>, and Epidemiology at <http://www.epidem.com/>). Information on the STROBE Initiative is available at [www.strobe-statement.org](http://www.strobe-statement.org).

# BMJ Open

## Camden Active Spaces: Does the Construction of Active School Playgrounds Influence Children's Physical Activity Levels? A Longitudinal Quasi-Experiment Protocol

|                                 |                                                                                                                                                                                                                                                                                                                                                                                                                                                                                                                                                         |
|---------------------------------|---------------------------------------------------------------------------------------------------------------------------------------------------------------------------------------------------------------------------------------------------------------------------------------------------------------------------------------------------------------------------------------------------------------------------------------------------------------------------------------------------------------------------------------------------------|
| Journal:                        | <i>BMJ Open</i>                                                                                                                                                                                                                                                                                                                                                                                                                                                                                                                                         |
| Manuscript ID:                  | bmjopen-2014-005729.R1                                                                                                                                                                                                                                                                                                                                                                                                                                                                                                                                  |
| Article Type:                   | Protocol                                                                                                                                                                                                                                                                                                                                                                                                                                                                                                                                                |
| Date Submitted by the Author:   | 15-Jul-2014                                                                                                                                                                                                                                                                                                                                                                                                                                                                                                                                             |
| Complete List of Authors:       | Smith, Lee; University College London, Epidemiology and Public Health<br>Kipps, Courtney; University College London Hospital, Institute of Sport, Exercise and Health<br>Aggio, Daniel; University College London, Epidemiology and Public Health<br>Fox, Paul; Camden Borough Council,<br>Robinson, Nigel; Camden Borough Council,<br>Trend, Verena; Camden Borough Council,<br>Munnery, Suzie; Camden Borough Council,<br>Kelly, Barry; Camden and Islington Public Health,<br>Hamer, Mark; University College London, Epidemiology and Public Health |
| <b>Primary Subject Heading</b>: | Public health                                                                                                                                                                                                                                                                                                                                                                                                                                                                                                                                           |
| Secondary Subject Heading:      | Paediatrics                                                                                                                                                                                                                                                                                                                                                                                                                                                                                                                                             |
| Keywords:                       | PREVENTIVE MEDICINE, PUBLIC HEALTH, SPORTS MEDICINE                                                                                                                                                                                                                                                                                                                                                                                                                                                                                                     |
|                                 |                                                                                                                                                                                                                                                                                                                                                                                                                                                                                                                                                         |

SCHOLARONE™  
Manuscripts

only



1  
2  
3 1 **Camden Active Spaces: Does the Construction of Active School Playgrounds Influence**  
4  
5 2 **Children's Physical Activity Levels? A Longitudinal Quasi-Experiment Protocol**  
6  
7  
8  
9 3

10  
11 4 Lee Smith\*, Health Behaviour Research Centre, Department of Epidemiology and Public

12 Health, University College London, London, UK, WC1E 6BT; [lee.smith@ucl.ac.uk](mailto:lee.smith@ucl.ac.uk); 020 7679

13  
14  
15 6 1812

16  
17  
18 7 Courtney Kipps, Institute Sport Exercise and Health, University College London Hospital,

19  
20  
21 8 London, UK

22  
23  
24 9 Daniel Aggio, Physical Activity Research Group, Department of Epidemiology and Public

25  
26  
27 10 Health, London, UK

28  
29  
30 11 Paul Fox, Camden Borough Council, London, UK

31  
32  
33 12 Nigel Robinson, Camden Borough Council, London, UK

34  
35  
36 13 Verena Trend, Camden Borough Council, London, UK

37  
38  
39 14 Suzie Munnery, Camden Borough Council, London, Uk

40  
41  
42 15 Barry Kelly, Camden and Islington Public Health, London, Uk

43  
44  
45 16 Mark Hamer, Physical Activity Research Group, Department of Epidemiology and Public

46  
47  
48 17 Health, London, UK

49  
50  
51 18 \*Corresponding author

52  
53  
54 19 **Key words: physical activity/ active play/ children/ school/ environment**  
55  
56  
57  
58  
59  
60

1  
2  
3  
4  
5  
6  
7  
8  
9  
10  
11  
12  
13  
14  
15  
16  
17  
18  
19  
20  
21  
22  
23  
24  
25  
26  
27  
28  
29  
30  
31  
32  
33  
34  
35  
36  
37  
38  
39  
40  
41  
42  
43  
44  
45  
46  
47  
48  
49  
50  
51  
52  
53  
54  
55  
56  
57  
58  
59  
60

20 **Word count: 2317**

21

22

23

24

25

26

27

28

29

30

31

32

33

34

35

36

37

For peer review only

1  
2  
3 38 **INTRODUCTION**  
4  
5

6 39 Physical activity is essential for every facet of children's health. However, physical activity  
7  
8 40 levels in British children are low. The school environment is a promising setting to increase  
9  
10 41 children's physical activity but limited empirical evidence exists on how a change in the  
11  
12 42 outdoor physical school environment influences physical activity behaviour. London  
13  
14 43 Borough of Camden is re-designing seven existing school playgrounds to engage children to  
15  
16 44 become more physically active.  
17

18  
19  
20  
21 45 The primary aim of this project is to evaluate the impact of the re-designed playgrounds on  
22  
23 46 children's physical activity, wellbeing, engagement, and physical function/fitness.  
24  
25

26 47  
27

28  
29 48 **METHOD AND ANALYSIS**  
30  
31

32 49 This project will use a longitudinal quasi-experimental design. Seven experimental schools  
33  
34 50 and one control school will take part. One baseline data collection session and two follow-  
35  
36 51 ups will be carried out. Between baseline and follow-up the experimental school  
37  
38 52 playgrounds will be re-designed. At baseline, a series of fitness tests, anthropometric and  
39  
40 53 questionnaire measurements, and 7 day objective physical activity monitoring (Actigraph  
41  
42 54 accelerometer) will be carried out on children (aged 5 to 16 years). This will be repeated at  
43  
44 55 follow-up. Changes in overall physical activity levels and levels during different times of the  
45  
46 56 day (eg, school breaks) will be examined. Multilevel regression modelling will be used to  
47  
48 57 analyse the data.  
49  
50  
51  
52  
53  
54  
55  
56  
57  
58  
59  
60

58

59

1  
2  
3 60  
4  
5  
6  
7 61

## 61 **ETHICS AND DISSEMINATION**

8  
9 62 The results of this study will be disseminated through peer-review publications and scientific  
10  
11 63 presentations. Ethical approval was obtained through the University College London  
12  
13  
14 64 Research Ethics Committee (Reference number: 4400/002).  
15  
16  
17 65  
18  
19  
20 66  
21  
22  
23 67  
24  
25  
26 68  
27  
28  
29 69  
30  
31  
32 70  
33  
34  
35 71  
36  
37  
38 72  
39  
40  
41 73  
42  
43  
44 74  
45  
46  
47 75  
48  
49  
50 76  
51  
52  
53 77  
54  
55  
56  
57  
58  
59  
60

1  
2  
3 78 **INTRODUCTION**  
4  
5

6 79 Physical activity is essential for every facet of children's (aged 5 to 16 years) health. For  
7  
8 80 example, higher levels of physical activity in children are associated with more favourable  
9  
10 81 cardiovascular disease risk factors whereas excessive levels of sedentary behaviour have the  
11  
12 82 reverse effect.[1,2] Physical activity can also benefit psychological health by aiding in the  
13  
14 83 prevention of anxiety and depressive symptoms and contributing to the improvement of  
15  
16 84 self-esteem.[3] Importantly, rather than detracting from learning, more physical activity and  
17  
18 85 breaks from sitting in school are thought to enhance cognitive function and academic  
19  
20 86 performance.[4] It is also more likely that active children will become active adults, since  
21  
22 87 some tracking of physical activity behaviour has been observed from childhood to  
23  
24 88 adulthood.[5] However, in westernised countries current levels of physical activity in  
25  
26 89 children are low as there are increasing opportunities to participate in sedentary  
27  
28 90 activities.[6,7] For example, it is recommended that children engage in physical activity of  
29  
30 91 moderate intensity for at least one hour a day, to maintain good health.[8] However, just  
31  
32 92 24% of British girls and 32% of boys achieve this recommendation.[7] Physical inactivity is  
33  
34 93 estimated to cost the NHS approximately £8 billion per year in health care costs alone.[8]  
35  
36 94 Encouraging physically active lifestyles in children is therefore crucial in nurturing a healthy  
37  
38 95 future generation of adults.  
39  
40  
41  
42  
43  
44  
45  
46

47 96 A recent meta-analysis found that the effects of interventions to increase physical activity in  
48  
49 97 children have been, at best, modest, and concluded that alternative approaches are  
50  
51 98 required.[9] In the UK, children spend approximately 60% of their weekday in school where  
52  
53 99 physical activity levels, particularly in girls, are low.[10,11] Environments both facilitate and  
54  
55 100 provide the arena for physical activity [12]. Interventions that target the school environment  
56  
57  
58  
59  
60

1  
2  
3 101 may offer great opportunity to increase physical activity levels. However, there is little  
4  
5 102 robust empirical evidence concerning the effect of changing the physical environment on  
6  
7 103 activity levels in children. Emerging data has suggested that a positive perception of the  
8  
9 104 school play environment was associated with higher levels of moderate-vigorous physical  
10  
11 105 activity (MVPA) during playtime.[13] Moreover, the number of permanent play facilities in  
12  
13 106 school playgrounds has been found to be associated with higher physical activity levels.[14]  
14  
15 107 A recent review [15] on the value of playgrounds for children’s physical activity identified 13  
16  
17 108 experimental studies, which have produced mixed findings, likely owing to differences in  
18  
19 109 intervention design. For example, the review identified that reducing playground density  
20  
21 110 increased physical activity levels, but the provision of play equipment produced mixed  
22  
23 111 effects, whereas no effects were found on the provision of playground markings and  
24  
25 112 promotion of physical activity by teachers. Just one study investigated the impact of “major”  
26  
27 113 playground reconstruction on children’s physical activity behaviour [16] and concluded  
28  
29 114 renovated schoolyards to promote physical activity may increase the number of children  
30  
31 115 who are physically active and may reduce sedentary behaviours. However, physical activity  
32  
33 116 data was collected using direct observation during the school day, only. This limits the ability  
34  
35 117 to examine carry over effects outside the school environment (ie, at weekends and during  
36  
37 118 evenings). Taken together, the emerging evidence suggests that the physical environment  
38  
39 119 could play an important role in children’s physical activity behaviour, but more robust  
40  
41 120 evidence is required.  
42  
43  
44  
45  
46  
47  
48  
49  
50  
51  
52  
53  
54  
55  
56  
57  
58  
59  
60

1  
2  
3 124 **SETTING**  
4  
5

6 125 Camden Borough Council is re-designing seven existing school playgrounds (five primary schools and  
7  
8 126 two secondary schools), that are thought not to be conducive to physical activity/ active play, with  
9  
10 127 exciting bespoke features to engage children to become more active. Each school will receive a  
11  
12 128 unique playground design, for example displayed in Figure 1. Example features include new  
13  
14 129 Astroturf games pitches, climbing frames, trampolines, monkey bars, and outdoor gyms, which have  
15  
16 130 been designed based on themes (eg, ancient ruins, volcanoes, clouds etc.) emerging from qualitative  
17  
18 131 work with children and teachers in each school. The research team did not carry out the qualitative  
19  
20 132 work nor did they provide input into the design of the playgrounds. Camden Council's underlying  
21  
22 133 goal is to encourage participation by creating opportunities for physical activity outside of  
23  
24 134 traditional sports or team competition. This presents a unique opportunity to evaluate the  
25  
26 135 impact of these structures on children's physical activity, health and wellbeing outcomes  
27  
28 136 while addressing previous limitations in the literature (ie, collecting activity only in school).  
29  
30  
31  
32  
33

34 137  
35  
36

37 138 We hypothesise that the new play grounds will increase young peoples' time spent in both light and  
38  
39 139 moderate-to-vigorous physical activity and reduce sedentary behaviour during break time, and  
40  
41 140 consequently improve levels of general fitness (eg, grip and leg strength, peak flow and adiposity).  
42  
43  
44

45 141  
46

47 142 **AIMS**  
48  
49

50 143 The *Camden Active Spaces* project consists of two key elements; 1) redesign of the school  
51  
52 144 playgrounds; 2) evaluation of the hypothesised benefits. In the present paper we focus on  
53  
54 145 the evaluation only. Thus, the primary aim of this project is to evaluate the impact of the re-  
55  
56  
57  
58  
59  
60

1  
2  
3 146 designed playgrounds on children's physical activity, wellbeing, engagement, and physical  
4  
5 147 function/fitness.  
6  
7

8  
9 148

## 10 11 149 **METHOD AND ANALYSES**

12  
13  
14  
15 150 The evaluation of *Camden Active Spaces* will use a longitudinal quasi-experimental design.  
16  
17 151 Baseline data collection will take place in the Spring/Summer term 2014, follow-up I data  
18  
19 152 collection will take place during the Autumn term 2014, and follow-up II during the Summer  
20  
21 153 term of 2015 (see Figure 2). Between baseline and follow-up I (school summer holidays) the  
22  
23 154 school playgrounds will be re-designed. A second follow-up will allow us to investigate if  
24  
25 155 short-term effects of the intervention (if they exist) are sustained over a longer period. This  
26  
27 156 evaluation has been funded by the Economic and Social Research Council, UK  
28  
29 157 (ES/M003795/1), whilst the core project (playground redesign) has been funded by Camden  
30  
31 158 Clinical Commissioning Group and London Borough of Camden. Ethical approval was  
32  
33 159 granted by the University College London Research Ethics Committee (4400/002).  
34  
35  
36  
37  
38  
39  
40  
41  
42

### 43 161 **Inclusion criteria**

#### 44 45 162 *School inclusion criteria*

46  
47  
48  
49 163 Seven schools located in the London Borough of Camden have been selected to receive the  
50  
51 164 re-designed playgrounds and all seven schools have agreed to take part in the study.  
52  
53

54  
55 165  
56  
57  
58  
59  
60



1  
2  
3 166 In addition to the seven experimental schools one control school will be recruited into the study.  
4  
5 167 This school will be located in the London Borough of Camden and it will not be receiving a new  
6  
7 168 playground design, moreover, it will not differ from experimental schools based on student  
8  
9 169 demographics or school policy. Owing to resources it is only feasible to collect data from a single  
10  
11 170 control school. The authors acknowledge that an equal number of controls to experimental schools  
12  
13 171 would allow for a more robust experimental design.  
14  
15

### 16 17 172 *Participant Inclusion criteria*

18  
19  
20 173 We aim to randomly select approximately 100 children (see below power calculation) evenly  
21  
22 174 distributed across school year groups (aged 5 to 11 years in primary school and aged 11 to  
23  
24 175 16 years in secondary school) from each of the eight schools (total sample size 800).  
25  
26  
27 176 Children aged 17 to 18 years or any school leavers in 2014 will not be asked to participate in  
28  
29 177 the current project, owing to time table restrictions due to final exams and potential loss to  
30  
31 178 follow up. Students whose parents have not opted them out of the study will be eligible to  
32  
33 179 participate (see section Ethics and Dissemination for details on obtaining consent).  
34  
35  
36

37 180  
38  
39

### 40 181 **Recruitment**

41  
42  
43 182 The seven schools who will be receiving the redesigned playgrounds have previously been  
44  
45 183 recruited into the study by Camden Borough Council. To recruit children into the study  
46  
47 184 presentations will be given to each year group within each school, during assemblies. The  
48  
49 185 presentations will disseminate information on *Camden Active Spaces*, what would be  
50  
51 186 involved if children were to take part in the study and benefits of the study to children and  
52  
53 187 the school. At the end of the presentations children will be given participant study  
54  
55 188 information sheets. In order to make parents aware of the study a parent information sheet  
56  
57  
58  
59  
60

1  
2  
3 189 will be emailed to all parents (translated into different languages where required), posted  
4  
5 190 on the school webpage, in addition to hard copies being made available at the school. In an  
6  
7 191 attempt to maximise response rates and adherence to protocol, each child who completes  
8  
9 192 the wear protocol will be awarded a one-month free swimming voucher and entered into a  
10  
11 193 prize draw to win an iPod Touch (one iPod Touch will be awarded per school). All schools  
12  
13 194 taking part in the study will be entered into a separate prize draw to win one of two  
14  
15  
16  
17 195 Nintendo Wiis.  
18  
19  
20  
21 196  
22  
23  
24

## 197 **Procedures**

25  
26 198 Data collection procedures will take place over a period of 12 months. A team of trained  
27  
28 199 researchers will collect data from each school on a date and time that is convenient for the  
29  
30 200 school. Children will be invited to take part in data collection. Data collection sessions will  
31  
32 201 last approximately 30 minutes. A series of fitness tests and anthropometric measurements  
33  
34 202 will be carried out on children, in an appropriate room in the school (e.g. sports or assembly  
35  
36 203 hall). Once fitness tests and anthropometric measurements have been completed objective  
37  
38 204 devices (accelerometers) will be given to children to monitor their physical activity  
39  
40 205 behaviour. Between four and seven days of accelerometer data are needed to provide a  
41  
42 206 reliable estimate of habitual physical activity.[17] Thus participants will be asked to wear  
43  
44 207 objective devices for 7 consecutive days. On day seven participants will return the device to  
45  
46 208 research staff at the school where they will then complete a questionnaire on their physical  
47  
48 209 activity behaviour. This exact process will be repeated at follow-up I and follow-up II.  
49  
50  
51  
52  
53  
54

55  
56 210  
57  
58  
59  
60

1  
2  
3 211 **Measurement and instruments**  
4

5  
6 212 *Accelerometer*  
7

8  
9 213 It is now recognised that accelerometers provide the most reliable and valid measurement  
10  
11 214 of activity in children [16] and are considered the gold standard approach. These wearable  
12  
13 215 motion sensors measure movement across three dimensions, thus providing minute-by-  
14  
15 216 minute time-stamped data on activity intensity, duration, and patterns across the day.  
16  
17

18  
19 217 Objective physical activity monitoring has been successfully used in similar study settings to  
20  
21 218 the present project.[14,18, 19]  
22

23  
24 219 The present evaluation will use the Actigraph GT3X accelerometer. This device is validated  
25  
26 220 and has been used in other studies with primary and high school children (see for example:  
27  
28 221 [www.iconnect.co.uk](http://www.iconnect.co.uk) and <http://www.cedar.iph.cam.ac.uk/research/directory/speedy/>). The  
29  
30

31 222 Actigraph GT3X is worn on a belt around the waist with the device itself positioned above  
32  
33 223 the right hip either over or under clothing. We will employ a sampling frequency of 30 hz.  
34  
35

36 224 Children will be asked to wear the device during waking hours every day for seven  
37  
38 225 consecutive days, but not during water-based activities or sleep.  
39  
40

41 226  
42

43  
44  
45 227 *Fitness Tests*  
46

47  
48 228 A series of fitness tests will be carried out, following Standard Operating Procedure Forms,  
49  
50 229 on all children taking part in the study. These tests have been extensively validated and used  
51  
52 230 in previous cohort studies of children (eg, <http://www.chasestudy.ac.uk/study->  
53  
54

55 231 measurement) Four fitness tests will be carried out to measure aspects of general fitness:  
56  
57 232 participants will be asked to perform the hand held Dynamometer test to assess grip  
58  
59  
60

1  
2  
3 233 strength, the standing horizontal jump test to assess leg power, the peak flow test to assess  
4  
5 234 lung function, and the sit-and-reach test to assess flexibility. Participants' weight and body  
6  
7  
8 235 composition will be measured using the Tanita SC-330 Body Composition Analyser (Tanita  
9  
10 236 Inc, IL, USA) and height will be measured using the Leicester Height Measure, from which  
11  
12 237 BMI will be calculated  $\text{kg/m}^2$ .  
13  
14

15  
16 238

17  
18  
19 239 *Questionnaires*

20  
21  
22 240 All children taking part in the study will be asked to complete a questionnaire. The  
23  
24 241 questionnaire will take approximately ten minutes to complete and includes questions on  
25  
26 242 standard demographics and physical activity, as well as potentially important correlates of  
27  
28 243 physical activity. Teaching assistants and research staff will assist all children in completing  
29  
30 244 questionnaires.  
31  
32

33  
34 245 The Girls Health Enrichment Multi-Studies (GEMS) physical activity survey has been  
35  
36 246 embedded within the questionnaire to give a subjective measure of physical activity and  
37  
38 247 provide an understanding of which specific physical activity behaviours are influenced by  
39  
40 248 the playground redesign, if any. GEMS has validity and reliability equivalent to other self-  
41  
42 249 report measures of physical activity [20] and was deemed suitable for both primary and high  
43  
44 250 school boys and girls by those who designed the present study, owing to its simplicity. The  
45  
46 251 questionnaire also includes items on travel mode (as used in the iConnect Study;  
47  
48 252 [www.iconnect.co.uk](http://www.iconnect.co.uk)).  
49  
50

51  
52  
53  
54 253 Teachers will be asked to complete the validated Strengths and Difficulties  
55  
56 254 questionnaire;[21] this questionnaire provides a measure of children's behaviour, mental  
57  
58  
59  
60

1  
2  
3 255 health, engagement and well-being and takes approximately five minutes to complete per  
4  
5 256 child.  
6  
7  
8  
9 257 Each school has one Head Teacher. Head Teachers (n=8) will be asked to complete a  
10  
11 258 questionnaire to allow for an understanding of differences between schools on “playground  
12  
13 259 policy.” Questions include, “During what type of weather are children not allowed to go  
14  
15 260 outside during scheduled breaks (i.e. rain/ snow)?” “Are any sections of the current  
16  
17 261 playground out of use during bad weather (i.e. school field when raining), if yes please  
18  
19 262 specify?” “When children cannot go outside on scheduled breaks, owing to bad weather,  
20  
21 263 where do they spend their break?” and “Are there any current initiatives/programs to  
22  
23 264 promote physical activity and/or healthy lifestyles in your school, if yes please specify?”  
24  
25  
26  
27 265 Head teachers will be asked to complete an identical survey at follow-up to allow for the  
28  
29 266 assessment of changes in “playground policy” between each time point.  
30  
31  
32  
33  
34  
35

## 36 268 **ANALYSIS**

### 39 269 *Outcome*

42 270 The primary outcome for this study will be change in average daily time spent in MVPA as  
43  
44 271 recorded by the Actigraph accelerometer. In addition the study has been designed to collect  
45  
46 272 the following secondary outcomes using participant questionnaires and objective measures  
47  
48 273 (1) change in average daily time spent sedentary, (2) change in average daily time spent in  
49  
50 274 light and vigorous activity at different times of the day (playtimes at school, leisure time at  
51  
52 275 home), (3) change in peak flow, sit-and-reach, grip strength, standing horizontal jump, and  
53  
54 276 body mass index (BMI)/body composition, (4) change in Strength and Difficulties scores.  
55  
56  
57  
58  
59  
60

1  
2  
3 277  
4  
5  
6

7 278 *Quantitative analysis*

8  
9 279 Raw data files will be extracted from each Actigraph device and processed using bespoke  
10  
11 280 software (Actilife) to quantify a range of features that will directly contribute to the  
12  
13 281 determination of active and sedentary time. We intend to follow methods used in the  
14  
15 282 International Children's Accelerometry Database study that incorporated children aged 4-18  
16  
17 283 yrs old [2]. Briefly, data files will be reintegrated to a 60-second epoch and non-wear time  
18  
19 284 defined as 60 minutes of consecutive zeros, allowing for 2 minutes of non-zero  
20  
21 285 interruptions. All children with at least 1 day with at least 500 minutes of measured monitor  
22  
23 286 wear time between 7 AM and midnight will be included. Total physical activity will be  
24  
25 287 expressed as total counts, including sedentary minutes, divided by measured time per day  
26  
27 288 (counts/min, cpm). Time spent sedentary will be defined as all minutes showing less than  
28  
29 289 100 cpm and MVPA time as minutes showing more than 3000 cpm. Multilevel modelling will  
30  
31 290 be used to analyse the data. This approach offers several advantages over simple regression  
32  
33 291 models. We will be able to model changes in activity over the three assessment periods  
34  
35 292 accounting for the inter-individual as well as intra-individual differences.  
36  
37  
38  
39  
40  
41  
42  
43  
44

45  
46

47 294 *Sample size*

48  
49 295 A previous school based intervention to examine the effects of changes in playground  
50  
51 296 structure on physical activity [18] demonstrated a small effect size ( $d = 0.10$ ). Thus, based on  
52  
53 297 these data, a sample size of  $N = 458$  would provide us with 80% power at 5% significance  
54  
55 298 level to detect small differences in moderate intensity physical activity using a repeated  
56  
57  
58  
59  
60

1  
2  
3 299 measures design (calculated using G-Power). We will aim to recruit 100 children from each  
4  
5 300 school to allow for dropout and incomplete Actigraph data.  
6  
7  
8

9 301

10  
11  
12 302 **ETHICAL CONSIDERATION AND DISSEMINATION**  
13

14  
15 303 Firstly, head teachers from each school will be asked to provide explicit written consent for  
16  
17 304 their schools and school children to take part in the study. Next, if parents (of primary and  
18  
19 305 secondary school children) do not want their child(ren) to take part in the study they will be  
20  
21 306 given the option to “opt-out” their child(ren), instructions to parents on how to opt-out  
22  
23 307 their child(ren) are provided in the parent study information sheet. Prior to data collection  
24  
25 308 all high school (not primary school) children will be asked to provide explicit written assent.  
26  
27  
28

29  
30 309 The findings from this study will be disseminated to academic researchers and to  
31  
32 310 policymakers through several mechanisms. First, we will employ the usual avenues for  
33  
34 311 dissemination of academic research, including conference presentations and journal  
35  
36 312 articles. Second, we will disseminate this research via social media outlets such as the  
37  
38 313 University College London – Physical Activity Research Group Twitter account. Third, with  
39  
40 314 Camden Council, we will include this physical activity study within the regular programme of  
41  
42 315 briefings that are presented to government departments interested in physical activity,  
43  
44 316 including the Department of Health, the Department for Communities and Local  
45  
46 317 Government, etc.  
47  
48

49  
50  
51  
52 318  
53  
54

55 319  
56  
57  
58  
59  
60

1  
2  
3 320 **Competing interests**  
4  
5

6 321 The authors declare that they have no competing interests.  
7  
8

9 322 **Funding**  
10

11  
12 323 This work was supported by The Economic and Social Research Council, UK (ES/M003795/1)  
13  
14

15 324 **Authors' contributions**  
16

17  
18 325 Lee Smith, Courtney Kipps, Daniel Aggio, Paul Fox, Nigel Robinson, Verena Trend, Suzie  
19

20 326 Munnery, Barry Kelly, and Mark Hamer made substantial contribution to the concept and  
21

22 327 design of the study. Lee Smith drafted the manuscript and Courtney Kipps, Daniel Aggio,  
23

24 328 Paul Fox, Nigel Robinson, Verena Trend, Suzie Munnery, Barry Kelly, and Mark Hamer  
25

26 329 revised it critically for important intellectual content. Lee Smith, Courtney Kipps, Daniel  
27

28 330 Aggio, Paul Fox, Nigel Robinson, Verena Trend, Suzie Munnery, Barry Kelly, and Mark Hamer  
29

30 331 approved the final version of the manuscript to be published.  
31  
32

33 332  
34  
35

36 333  
37  
38

39 334  
40  
41

42 335  
43  
44

45 336  
46  
47

48 337  
49  
50

51 338  
52  
53  
54  
55  
56  
57  
58  
59  
60



## 339 REFERENCES

- 340 1. Strong WB, Malina RM, Blimkie CJR, et al. Evidence based physical activity for school-age youth. *J*  
341 *Pediatr-Us* 2005;146(6):732-37.
- 342 2. Ekelund U, Luan JA, Sherar LB, et al. Moderate to Vigorous Physical Activity and Sedentary Time  
343 and Cardiometabolic Risk Factors in Children and Adolescents. *Jama-J Am Med Assoc*  
344 2012;307(7):704-12.
- 345 3. Centre for Diseases and Control Prevention. Physical Activity and Health. Atlanta, US.  
346 2013.
- 347 4. Lees C, Hopkins J. Effect of Aerobic Exercise on Cognition, Academic Achievement, and  
348 Psychosocial Function in Children: A Systematic Review of Randomized Control Trials.  
349 *Preventing Chronic Disease* 2013;10.
- 350 5. Telama R, Yang X, Viikari J, et al. Physical activity from childhood to adulthood: a 21-year tracking  
351 study. *American journal of preventive medicine* 2005;28(3):267-73.
- 352 6. Griffiths LJ, Cortina-Borja M, Sera F, et al. How active are our children? Findings from the  
353 Millennium Cohort Study. *BMJ open* 2013;3(8).
- 354 7. Joint Health Surveys Unit. The Health Survey for England 2008. The Information Centre for Health  
355 and Social Care, 2009, Leeds. [www.ic.nhs.uk/pubs/hse08physicalactivity](http://www.ic.nhs.uk/pubs/hse08physicalactivity)
- 356 8. Department of Health. Start Active Stay Active: A report on physical activity for health from the  
357 four home countries' Chief Medical Officers (UK). July 2011.
- 358 9. Metcalf B, Henley W, Wilkin T. Effectiveness of intervention on physical activity of children:  
359 systematic review and meta-analysis of controlled trials with objectively measured  
360 outcomes. *British Journal of Sports Medicine* 2013;47(4):226-26.
- 361 10. Smith L, Sahlqvist S, Ogilvie D, et al. Is active travel to non-school destinations associated with  
362 physical activity in primary school children? *Preventive medicine* 2012;54(3-4):224-28.
- 363 11. Nettlefold L, McKay HA, Warburton DER. The challenge of low physical activity during the school  
364 day: at recess, lunch and in physical education. *British Journal of Sports Medicine*  
365 2011;45(10):819-19.
- 366 12. Fisher A, van Jaarsveld CHM, Llewellyn CH, et al. Environmental Influences on Children's Physical  
367 Activity: Quantitative Estimates Using a Twin Design. *PloS one* 2010;5(4).
- 368 13. Yildirim M, Arundell L, Cerin E, et al. What helps children to move more at school recess and  
369 lunchtime? Mid-intervention results from Transform-Us! cluster-randomised controlled trial.  
370 *British Journal of Sports Medicine* 2014;48(3):271-77.
- 371 14. Taylor R, Farmer V, Cameron S, et al. School playgrounds and physical activity policies as  
372 predictors of school and home activity. *Int Jr Behav Nutr Phys Act* 2011; 8(1):38.
- 373 15. Broekhuizen K, Scholten A, de Vries S. The value of (pre)school playgrounds for children's  
374 physical activity level: a systematic review. *Int Jr Behav Nutr Phys Act* 2014; 11:59.
- 375 16. Brink L, Nigg C, Lampe S, et al. Influence of schoolyard renovation on children's physical activity:  
376 The learning landscape Program. *Research and Practice* 2010; 100(9): 1672-78.
- 377 17. Corder K, Brage S, Ekelund U. Accelerometers and pedometers: methodology and clinical  
378 application. *Curr Opin Clin Nutr* 2007;10(5):597-603.
- 379 18. Blaes A, Ridgers ND, Aucouturier J, et al. Effects of a playground marking intervention on school  
380 recess physical activity in French children. *Preventive medicine* 2013;57(5):580-4.
- 381 19. Smith L, Sahlqvist S, Ogilvie D, et al. Is a change in mode of travel to school associated with a  
382 change in overall physical activity levels in children? Longitudinal results from the SPEEDY  
383 study. *Int J Behav Nutr Phy* 2012;9.
- 384 20. Truth MS, Sherwood NE, Butte NF, et al. Validity and reliability of activity measures in African-  
385 American girls for GEMS. *Med Sci Sports Exerc* 2003;35(3):532-9.
- 386 21. Goodman R. Psychometric properties of the strengths and difficulties questionnaire. *Journal of*  
387 *the American Academy of Child and Adolescent Psychiatry* 2001;40(11):1337-45.

1  
2  
3 388  
4  
5

6 389 **Figure Legends**  
7

8  
9 390 **Figure 1: Example of new playground designs**  
10

11  
12 391 **Figure 2: Overview of study design**  
13

14  
15 392  
16

17 393  
18  
19

20  
21 394  
22  
23  
24  
25  
26  
27  
28  
29  
30  
31  
32  
33  
34  
35  
36  
37  
38  
39  
40  
41  
42  
43  
44  
45  
46  
47  
48  
49  
50  
51  
52  
53  
54  
55  
56  
57  
58  
59  
60

For peer review only

1  
2  
3 1 **Camden Active Spaces: Does the Construction of Active School Playgrounds Influence**  
4  
5 2 **Children's Physical Activity Levels? A Longitudinal Quasi-Experiment Protocol**  
6  
7  
8  
9 3

10  
11 4 Lee Smith\*, Health Behaviour Research Centre, Department of Epidemiology and Public

12 Health, University College London, London, UK, WC1E 6BT; [lee.smith@ucl.ac.uk](mailto:lee.smith@ucl.ac.uk); 020 7679

13  
14  
15  
16 6 1812

17  
18  
19 7 Courtney Kipps, Institute Sport Exercise and Health, University College London Hospital,

20  
21  
22 8 London, UK

23  
24  
25 9 Daniel Aggio, Physical Activity Research Group, Department of Epidemiology and Public

26  
27  
28 10 Health, London, UK

29  
30  
31 11 Paul Fox, Camden Borough Council, London, UK

32  
33  
34 12 Nigel Robinson, Camden Borough Council, London, UK

35  
36  
37 13 Verena Trend, Camden Borough Council, London, UK

38  
39  
40 14 Suzie Munnery, Camden Borough Council, London, UK

41  
42  
43 15 Barry Kelly, Camden and Islington Public Health, London, UK

44  
45  
46 16 Mark Hamer, Physical Activity Research Group, Department of Epidemiology and Public

47  
48  
49 17 Health, London, UK

50  
51  
52 18 \*Corresponding author

53  
54  
55 19 **Key words: physical activity/ active play/ children/ school/ environment**  
56  
57  
58  
59  
60

1  
2  
3  
4  
5  
6  
7  
8  
9  
10  
11  
12  
13  
14  
15  
16  
17  
18  
19  
20  
21  
22  
23  
24  
25  
26  
27  
28  
29  
30  
31  
32  
33  
34  
35  
36  
37  
38  
39  
40  
41  
42  
43  
44  
45  
46  
47  
48  
49  
50  
51  
52  
53  
54  
55  
56  
57  
58  
59  
60

20 **Word count: 2317**

21

22

23

24

25

26

27

28

29

30

31

32

33

34

35

36

37

For peer review only

## 38 INTRODUCTION

39 Physical activity is essential for every facet of children’s health. However, physical activity  
40 levels in British children are low. The school environment is a promising setting to increase  
41 children’s physical activity but limited empirical evidence exists on how a change in the  
42 outdoor physical school environment influences physical activity behaviour. London  
43 Borough of Camden is re-designing seven existing school playgrounds to engage children to  
44 become more physically active.

45 **The primary aim of this project is to evaluate the impact of the re-designed playgrounds on**  
46 **children’s physical activity, wellbeing, engagement, and physical function/fitness.**

## 48 METHOD AND ANALYSIS

49 **This project will use a longitudinal quasi-experimental design. Seven experimental schools**  
50 **and one control school will take part. One baseline data collection session and two follow-**  
51 **ups will be carried out. Between baseline and follow-up the experimental school**  
52 **playgrounds will be re-designed. At baseline, a series of fitness tests, anthropometric and**  
53 **questionnaire measurements, and 7 day objective physical activity monitoring (Actigraph**  
54 **accelerometer) will be carried out on children (aged 5 to 16 years). This will be repeated at**  
55 **follow-up. Changes in overall physical activity levels and levels during different times of**  
56 **the day (eg, school breaks) will be examined. Multilevel regression modelling will be used**  
57 **to analyse the data.**

1  
2  
3 60  
4  
5  
6  
7 61

## 61 ETHICS AND DISSEMINATION

8  
9 62 The results of this study will be disseminated through peer-review publications and scientific  
10  
11 63 presentations. Ethical approval was obtained through the University College London  
12  
13  
14 64 Research Ethics Committee (Reference number: 4400/002).  
15  
16  
17 65  
18  
19  
20 66  
21  
22  
23 67  
24  
25  
26 68  
27  
28  
29 69  
30  
31  
32 70  
33  
34  
35 71  
36  
37  
38 72  
39  
40  
41 73  
42  
43  
44 74  
45  
46  
47 75  
48  
49  
50 76  
51  
52  
53 77  
54  
55  
56  
57  
58  
59  
60

1  
2  
3 78 **INTRODUCTION**  
4  
5

6 79 Physical activity is essential for every facet of children's (aged 5 to 16 years) health. For  
7  
8 80 example, higher levels of physical activity in children are associated with more favourable  
9  
10 81 cardiovascular disease risk factors whereas excessive levels of sedentary behaviour have the  
11  
12 82 reverse effect.[1,2] Physical activity can also benefit psychological health by aiding in the  
13  
14 83 prevention of anxiety and depressive symptoms and contributing to the improvement of  
15  
16 84 self-esteem.[3] Importantly, rather than detracting from learning, more physical activity and  
17  
18 85 breaks from sitting in school are thought to enhance cognitive function and academic  
19  
20 86 performance.[4] It is also more likely that active children will become active adults, since  
21  
22 87 some tracking of physical activity behaviour has been observed from childhood to  
23  
24 88 adulthood.[5] However, in westernised countries current levels of physical activity in  
25  
26 89 children are low as there are increasing opportunities to participate in sedentary  
27  
28 90 activities.[6,7] For example, it is recommended that children engage in physical activity of  
29  
30 91 moderate intensity for at least one hour a day, to maintain good health.[8] However, just  
31  
32 92 24% of British girls and 32% of boys achieve this recommendation.[7] Physical inactivity is  
33  
34 93 estimated to cost the NHS approximately £8 billion per year in health care costs alone.[8]  
35  
36 94 Encouraging physically active lifestyles in children is therefore crucial in nurturing a healthy  
37  
38 95 future generation of adults.  
39  
40  
41  
42  
43  
44  
45

46  
47 **A recent meta-analysis found that the effects of interventions to increase physical activity**  
48  
49 **in children have been, at best, modest, and concluded that alternative approaches are**  
50  
51 **required.[9] In the UK, children spend approximately 60% of their weekday in school**  
52  
53 **where physical activity levels, particularly in girls, are low.[10,11] Environments both**  
54  
55 **facilitate and provide the arena for physical activity [12]. Interventions that target the**  
56  
57  
58  
59  
60

1  
2  
3 101 school environment may offer great opportunity to increase physical activity levels.  
4  
5 102 However, there is little robust empirical evidence concerning the effect of changing the  
6  
7 103 physical environment on activity levels in children. Emerging data has suggested that a  
8  
9 104 positive perception of the school play environment was associated with higher levels of  
10  
11 105 moderate-vigorous physical activity (MVPA) during playtime.[13] Moreover, the number  
12  
13 106 of permanent play facilities in school playgrounds has been found to be associated with  
14  
15 107 higher physical activity levels.[14] A recent review [15] on the value of playgrounds for  
16  
17 108 children's physical activity identified 13 experimental studies, which have produced mixed  
18  
19 109 findings, likely owing to differences in intervention design. For example, the review  
20  
21 110 identified that reducing playground density increased physical activity levels, but the  
22  
23 111 provision of play equipment produced mixed effects, whereas no effects were found on  
24  
25 112 the provision of playground markings and promotion of physical activity by teachers. Just  
26  
27 113 one study investigated the impact of "major" playground reconstruction on children's  
28  
29 114 physical activity behaviour [16] and concluded renovated schoolyards to promote physical  
30  
31 115 activity may increase the number of children who are physically active and may reduce  
32  
33 116 sedentary behaviours. However, physical activity data was collected using direct  
34  
35 117 observation during the school day, only. This limits the ability to examine carry over  
36  
37 118 effects outside the school environment (ie, at weekends and during evenings). Taken  
38  
39 119 together, the emerging evidence suggests that the physical environment could play an  
40  
41 120 important role in children's physical activity behaviour, but more robust evidence is  
42  
43 121 required.  
44  
45  
46  
47  
48  
49  
50  
51  
52  
53  
54  
55  
56  
57 123  
58  
59  
60



1  
2  
3 124 **SETTING**  
4  
5

6 125 Camden Borough Council is re-designing seven existing school playgrounds (five primary schools  
7  
8 126 and two secondary schools), that are thought not to be conducive to physical activity/ active play,  
9  
10 127 with exciting bespoke features to engage children to become more active. Each school will receive  
11  
12 128 a unique playground design, for example displayed in Figure 1. Example features include new  
13  
14 129 Astroturf games pitches, climbing frames, trampolines, monkey bars, and outdoor gyms, which  
15  
16 130 have been designed based on themes (eg, ancient ruins, volcanoes, clouds etc.) emerging from  
17  
18 131 qualitative work with children and teachers in each school. The research team did not carry out  
19  
20 132 the qualitative work nor did they provide input into the design of the playgrounds. Camden  
21  
22  
23  
24 133 Council's underlying goal is to encourage participation by creating opportunities for physical  
25  
26 134 activity outside of traditional sports or team competition. This presents a unique  
27  
28 135 opportunity to evaluate the impact of these structures on children's physical activity, health  
29  
30 136 and wellbeing outcomes while addressing previous limitations in the literature (ie, collecting  
31  
32 137 activity only in school).  
33  
34  
35

36 138  
37  
38  
39 139 We hypothesise that the new play grounds will increase young peoples' time spent in both light  
40  
41 140 and moderate-to-vigorous physical activity and reduce sedentary behaviour during break time,  
42  
43 141 and consequently improve levels of general fitness (eg, grip and leg strength, peak flow and  
44  
45 142 adiposity).  
46  
47  
48

49 143

50  
51  
52 144 **AIMS**  
53

54  
55 145 The *Camden Active Spaces* project **consists** of two key elements; 1) redesign of the school  
56  
57 146 playgrounds; 2) evaluation of the hypothesised benefits. In the present paper we focus on  
58  
59  
60

1  
2  
3 147 the evaluation only. Thus, the primary aim of this project is to evaluate the impact of the re-  
4  
5 148 designed playgrounds on children's physical activity, wellbeing, engagement, and physical  
6  
7 149 function/fitness.  
8  
9

10  
11 150

## 12 13 14 151 **METHOD AND ANALYSES**

15  
16  
17 152 The evaluation of *Camden Active Spaces* will use a longitudinal quasi-experimental design.  
18  
19 153 Baseline data collection will take place in the Spring/Summer term 2014, follow-up I data  
20  
21 154 collection will take place during the Autumn term 2014, and follow-up II during the Summer  
22  
23 155 term of 2015 (see Figure 2). Between baseline and follow-up I (school summer holidays) the  
24  
25 156 school playgrounds will be re-designed. A second follow-up will allow us to investigate if  
26  
27 157 short-term effects of the intervention (if they exist) are sustained over a longer period. This  
28  
29 158 evaluation has been funded by the Economic and Social Research Council, UK  
30  
31 159 (ES/M003795/1), whilst the core project (playground redesign) has been funded by Camden  
32  
33 160 Clinical Commissioning Group and London Borough of Camden. Ethical approval was  
34  
35 161 granted by the University College London Research Ethics Committee (4400/002).  
36  
37  
38  
39

40  
41  
42 162

### 43 44 163 **Inclusion criteria**

#### 45 46 47 164 *School inclusion criteria*

48  
49  
50 165 Seven schools located in the London Borough of Camden have been selected to receive the  
51  
52 166 re-designed playgrounds and all seven schools have agreed to take part in the study.  
53  
54

55  
56  
57 167  
58  
59  
60

1  
2  
3 168 In addition to the seven experimental schools one control school will be recruited into the study.  
4  
5 169 This school will be located in the London Borough of Camden and it will not be receiving a new  
6  
7 170 playground design, moreover, it will not differ from experimental schools based on student  
8  
9 171 demographics or school policy. Owing to resources it is only feasible to collect data from a single  
10  
11 172 control school. The authors acknowledge that an equal number of controls to experimental  
12  
13 173 schools would allow for a more robust experimental design.

#### 174 *Participant Inclusion criteria*

175 We aim to randomly select approximately 100 children (see below power calculation) evenly  
176 distributed across school year groups (aged 5 to 11 years in primary school and aged 11 to  
177 16 years in secondary school) from each of the eight schools (total sample size 800).  
178 Children aged 17 to 18 years or any school leavers in 2014 will not be asked to participate in  
179 the current project, owing to time table restrictions due to final exams and potential loss to  
180 follow up. Students whose parents have not opted them out of the study will be eligible to  
181 participate (see section Ethics and Dissemination for details on obtaining consent).

182

#### 183 **Recruitment**

184 The seven schools who will be receiving the redesigned playgrounds have previously been  
185 recruited into the study by Camden Borough Council. To recruit children into the study  
186 presentations will be given to each year group within each school, during assemblies. The  
187 presentations will disseminate information on *Camden Active Spaces*, what would be  
188 involved if children were to take part in the study and benefits of the study to children and  
189 the school. At the end of the presentations children will be given participant study  
190 information sheets. In order to make parents aware of the study a parent information sheet

1  
2  
3 191 will be emailed to all parents (translated into different languages where required), posted  
4  
5 192 on the school webpage, in addition to hard copies being made available at the school. In an  
6  
7 193 attempt to maximise response rates and adherence to protocol, each child who completes  
8  
9 194 the wear protocol will be awarded a one-month free swimming voucher and entered into a  
10  
11 195 prize draw to win an iPod Touch (one iPod Touch will be awarded per school). All schools  
12  
13 196 taking part in the study will be entered into a separate prize draw to win one of two  
14  
15 197 Nintendo Wiis.  
16  
17  
18  
19  
20  
21 198  
22  
23  
24 199 **Procedures**

25  
26 200 Data collection procedures will take place over a period of **12 months**. A team of trained  
27  
28 201 researchers will collect data from each school on a date and time that is convenient for the  
29  
30 202 school. Children will be invited to take part in data collection. Data collection sessions will  
31  
32 203 last approximately 30 minutes. A series of fitness tests and anthropometric measurements  
33  
34 204 will be carried out on children, in an appropriate room in the school (e.g. sports or assembly  
35  
36 205 hall). Once fitness tests and anthropometric measurements have been completed objective  
37  
38 206 devices (accelerometers) will be given to children to monitor their physical activity  
39  
40 207 behaviour. Between four and seven days of accelerometer data are needed to provide a  
41  
42 208 reliable estimate of habitual physical activity.[17] Thus participants will be asked to wear  
43  
44 209 objective devices for 7 consecutive days. On day seven participants will return the device to  
45  
46 210 research staff at the school where they will then complete a questionnaire on their physical  
47  
48 211 activity behaviour. This exact process will be repeated at follow-up I and follow-up II.  
49  
50  
51  
52  
53  
54  
55  
56 212

1  
2  
3 213 **Measurement and instruments**  
4

5  
6 214 *Accelerometer*  
7

8  
9 215 It is now recognised that accelerometers provide the most reliable and valid measurement  
10  
11 216 of activity in children [16] and are considered the gold standard approach. These wearable  
12  
13 217 motion sensors measure movement across three dimensions, thus providing minute-by-  
14  
15 218 minute time-stamped data on activity intensity, duration, and patterns across the day.  
16  
17

18  
19 219 Objective physical activity monitoring has been successfully used in similar study settings to  
20  
21 220 the present project.[14,18, 19]  
22

23  
24 221 The present evaluation will use the Actigraph GT3X accelerometer. This device is validated  
25  
26 222 and has been used in other studies with primary and high school children (see for example:  
27  
28 223 [www.iconnect.co.uk](http://www.iconnect.co.uk) and <http://www.cedar.iph.cam.ac.uk/research/directory/speedy/>). The  
29  
30

31 224 Actigraph GT3X is worn on a belt around the waist with the device itself positioned above  
32  
33 225 the right hip either over or under clothing. **We will employ a sampling frequency of 30 hz.**  
34  
35

36 226 Children will be asked to wear the device during waking hours every day for seven  
37  
38 227 consecutive days, but not during water-based activities or sleep.  
39  
40

41 228  
42

43  
44  
45 229 *Fitness Tests*  
46

47  
48 230 A series of fitness tests will be carried out, following Standard Operating Procedure Forms,  
49  
50 231 on all children taking part in the study. These tests have been extensively validated and used  
51  
52 232 in previous cohort studies of children (eg, <http://www.chasestudy.ac.uk/study->  
53  
54 233 measurement) Four fitness tests will be carried out to measure aspects of general fitness:  
55  
56 234 participants will be asked to perform the hand held Dynamometer test to assess grip  
57  
58  
59  
60

1  
2  
3 235 strength, the standing horizontal jump test to assess leg power, the peak flow test to assess  
4  
5 236 lung function, and the sit-and-reach test to assess flexibility. Participants' weight and body  
6  
7  
8 237 composition will be measured using the Tanita SC-330 Body Composition Analyser (Tanita  
9  
10 238 Inc, IL, USA) and height will be measured using the Leicester Height Measure, from which  
11  
12 239 BMI will be calculated  $\text{kg/m}^2$ .

14  
15  
16 240

17  
18  
19 241 *Questionnaires*

20  
21  
22 242 All children taking part in the study will be asked to complete a questionnaire. The  
23  
24 243 questionnaire will take approximately ten minutes to complete and includes questions on  
25  
26 244 standard demographics and physical activity, as well as potentially important correlates of  
27  
28 245 physical activity. **Teaching assistants and research staff will assist all children in completing**  
29  
30  
31 246 **questionnaires.**

32  
33  
34 247 **The Girls Health Enrichment Multi-Studies (GEMS) physical activity survey has been**  
35  
36 248 **embedded within the questionnaire to give a subjective measure of physical activity and**  
37  
38 249 **provide an understanding of which specific physical activity behaviours are influenced by**  
39  
40 250 **the playground redesign, if any.** GEMS has validity and reliability equivalent to other self-  
41  
42 251 report measures of physical activity [20] and was deemed suitable for both primary and high  
43  
44 252 school boys and girls by those who designed the present study, owing to its simplicity. The  
45  
46 253 questionnaire also includes items on travel mode (as used in the iConnect Study;  
47  
48 254 [www.iconnect.co.uk](http://www.iconnect.co.uk)).

49  
50  
51 255 **Teachers will be asked to complete the validated Strengths and Difficulties**  
52  
53  
54 256 **questionnaire;[21] this questionnaire provides a measure of children's behaviour, mental**

1  
2  
3 257 health, engagement and well-being and takes approximately five minutes to complete per  
4  
5 258 child.  
6  
7  
8  
9 259 Each school has one Head Teacher. Head Teachers (n=8) will be asked to complete a  
10  
11 260 questionnaire to allow for an understanding of differences between schools on  
12  
13 261 "playground policy." Questions include, "During what type of weather are children not  
14  
15 262 allowed to go outside during scheduled breaks (i.e. rain/ snow)?" "Are any sections of the  
16  
17 263 current playground out of use during bad weather (i.e. school field when raining), if yes  
18  
19 264 please specify?" "When children cannot go outside on scheduled breaks, owing to bad  
20  
21 265 weather, where do they spend their break?" and "Are there any current  
22  
23 266 initiatives/programs to promote physical activity and/or healthy lifestyles in your school,  
24  
25 267 if yes please specify?" Head teachers will be asked to complete an identical survey at  
26  
27  
28  
29 268 follow-up to allow for the assessment of changes in "playground policy" between each  
30  
31 269 time point.  
32  
33  
34  
35  
36  
37  
38  
39 270

## 271 ANALYSIS

### 272 Outcome

273 The primary outcome for this study will be change in average daily time spent in MVPA as  
274 recorded by the Actigraph accelerometer. In addition the study has been designed to collect  
275 the following secondary outcomes using participant questionnaires and objective measures  
276 (1) change in average daily time spent sedentary, (2) change in average daily time spent in  
277 light and vigorous activity at different times of the day (playtimes at school, leisure time at

1  
2  
3 278 home), (3) change in peak flow, sit-and-reach, grip strength, standing horizontal jump, and  
4  
5 279 body mass index (BMI)/body composition, **(4) change in Strength and Difficulties scores.**  
6  
7

8  
9 280

10  
11 281 *Quantitative analysis*

12  
13  
14 282 Raw data files will be extracted from each Actigraph device and processed using bespoke  
15  
16  
17 283 software (Actilife) to quantify a range of features that will directly contribute to the  
18  
19 284 determination of active and sedentary time. **We intend to follow methods used in the**  
20  
21  
22 285 **International Children's Accelerometry Database study that incorporated children aged 4-**  
23  
24 286 **18 yrs old [2]. Briefly, data files will be reintegrated to a 60-second epoch and non-wear**  
25  
26 287 **time defined as 60 minutes of consecutive zeros, allowing for 2 minutes of non-zero**  
27  
28 288 **interruptions. All children with at least 1 day with at least 500 minutes of measured**  
29  
30 289 **monitor wear time between 7 AM and midnight will be included. Total physical activity**  
31  
32 290 **will be expressed as total counts, including sedentary minutes, divided by measured time**  
33  
34 291 **per day (counts/min, cpm). Time spent sedentary will be defined as all minutes showing**  
35  
36 292 **less than 100 cpm and MVPA time as minutes showing more than 3000 cpm.** Multilevel  
37  
38 293 modelling will be used to analyse the data. This approach offers several advantages over  
39  
40 294 simple regression models. We will be able to model changes in activity over the three  
41  
42 295 assessment periods accounting for the inter-individual as well as intra-individual differences.  
43  
44  
45  
46  
47

48 296

49  
50  
51 297 *Sample size*

52  
53  
54  
55 298 A previous school based intervention to examine the effects of changes in playground  
56  
57 299 structure on physical activity [18] demonstrated a small effect size ( $d = 0.10$ ). Thus, based on  
58  
59  
60



1  
2  
3 300 these data, a sample size of N=458 would provide us with 80% power at 5% significance  
4  
5 301 level to detect small differences in moderate intensity physical activity using a repeated  
6  
7 302 measures design (calculated using G-Power). We will aim to recruit 100 children from each  
8  
9  
10 303 school to allow for dropout and incomplete Actigraph data.  
11  
12  
13  
14 304  
15  
16  
17 305 **ETHICAL CONSIDERATION AND DISSEMINATION**  
18  
19

20 306 Firstly, head teachers from each school will be asked to provide explicit written consent for  
21  
22 307 their schools and school children to take part in the study. Next, if parents **(of primary and**  
23  
24 308 **secondary school children)** do not want their child(ren) to take part in the study they will be  
25  
26  
27 309 given the option to “opt-out” their child(ren), instructions to parents on how to opt-out  
28  
29 310 their child(ren) are provided in the parent study information sheet. Prior to data collection  
30  
31 311 all high school (not primary school) children will be asked to provide explicit written assent.  
32  
33

34  
35 312 The findings from this study will be disseminated to academic researchers and to  
36  
37 313 policymakers through several mechanisms. First, we will employ the usual avenues for  
38  
39 314 dissemination of academic research, including conference presentations and journal  
40  
41 315 articles. Second, we will disseminate this research via social media outlets such as the  
42  
43 316 University College London – Physical Activity Research Group Twitter account. Third, with  
44  
45 317 Camden Council, we will include this physical activity study within the regular programme of  
46  
47 318 briefings that are presented to government departments interested in physical activity,  
48  
49 319 including the Department of Health, the Department for Communities and Local  
50  
51 320 Government, etc.  
52  
53  
54  
55  
56  
57  
58  
59  
60

1  
2  
3 322 **Competing interests**  
4  
5

6 323 The authors declare that they have no competing interests.  
7  
8

9 324 **Funding**  
10

11  
12 325 This work was supported by The Economic and Social Research Council, UK (ES/M003795/1)  
13  
14

15 326 **Authors' contributions**  
16

17  
18 327 Lee Smith, Courtney Kipps, Daniel Aggio, Paul Fox, Nigel Robinson, Verena Trend, Suzie  
19

20 328 Munnery, Barry Kelly, and Mark Hamer made substantial contribution to the concept and  
21

22 329 design of the study. Lee Smith drafted the manuscript and Courtney Kipps, Daniel Aggio,  
23

24 330 Paul Fox, Nigel Robinson, Verena Trend, Suzie Munnery, Barry Kelly, and Mark Hamer  
25

26 331 revised it critically for important intellectual content. Lee Smith, Courtney Kipps, Daniel  
27

28 332 Aggio, Paul Fox, Nigel Robinson, Verena Trend, Suzie Munnery, Barry Kelly, and Mark Hamer  
29

30 333 approved the final version of the manuscript to be published.  
31  
32

33  
34 334  
35

36  
37 335  
38  
39

40 336 **Figure Legends**  
41  
42

43 337 **Figure 1: Example of new playground designs**  
44  
45

46 338 **Figure 2: Overview of study design**  
47  
48

49  
50 339  
51  
52

53  
54 340  
55  
56  
57  
58  
59  
60

## 341 REFERENCES

- 342 1. Strong WB, Malina RM, Blimkie CJR, et al. Evidence based physical activity for school-age youth. *J*  
343 *Pediatr-Us* 2005;146(6):732-37.
- 344 2. Ekelund U, Luan JA, Sherar LB, et al. Moderate to Vigorous Physical Activity and Sedentary Time  
345 and Cardiometabolic Risk Factors in Children and Adolescents. *Jama-J Am Med Assoc*  
346 2012;307(7):704-12.
- 347 3. Centre for Diseases and Control Prevention. Physical Activity and Health. Atlanta, US.  
348 2013.
- 349 4. Lees C, Hopkins J. Effect of Aerobic Exercise on Cognition, Academic Achievement, and  
350 Psychosocial Function in Children: A Systematic Review of Randomized Control Trials.  
351 *Preventing Chronic Disease* 2013;10.
- 352 5. Telama R, Yang X, Viikari J, et al. Physical activity from childhood to adulthood: a 21-year tracking  
353 study. *American journal of preventive medicine* 2005;28(3):267-73.
- 354 6. Griffiths LJ, Cortina-Borja M, Sera F, et al. How active are our children? Findings from the  
355 Millennium Cohort Study. *BMJ open* 2013;3(8).
- 356 7. Joint Health Surveys Unit. The Health Survey for England 2008. The Information Centre for Health  
357 and Social Care, 2009, Leeds. [www.ic.nhs.uk/pubs/hse08physicalactivity](http://www.ic.nhs.uk/pubs/hse08physicalactivity)
- 358 8. Department of Health. Start Active Stay Active: A report on physical activity for health from the  
359 four home countries' Chief Medical Officers (UK). July 2011.
- 360 9. Metcalf B, Henley W, Wilkin T. Effectiveness of intervention on physical activity of children:  
361 systematic review and meta-analysis of controlled trials with objectively measured  
362 outcomes. *British Journal of Sports Medicine* 2013;47(4):226-26.
- 363 10. Smith L, Sahlqvist S, Ogilvie D, et al. Is active travel to non-school destinations associated with  
364 physical activity in primary school children? *Preventive medicine* 2012;54(3-4):224-28.
- 365 11. Nettlefold L, McKay HA, Warburton DER. The challenge of low physical activity during the school  
366 day: at recess, lunch and in physical education. *British Journal of Sports Medicine*  
367 2011;45(10):819-19.
- 368 12. Fisher A, van Jaarsveld CHM, Llewellyn CH, et al. Environmental Influences on Children's Physical  
369 Activity: Quantitative Estimates Using a Twin Design. *PloS one* 2010;5(4).
- 370 13. Yildirim M, Arundell L, Cerin E, et al. What helps children to move more at school recess and  
371 lunchtime? Mid-intervention results from Transform-Us! cluster-randomised controlled trial.  
372 *British Journal of Sports Medicine* 2014;48(3):271-77.
- 373 14. Taylor R, Farmer V, Cameron S, et al. School playgrounds and physical activity policies as  
374 predictors of school and home activity. *Int Jr Behav Nutr Phys Act* 2011; 8(1):38.
- 375 15. Broekhuizen K, Scholten A, de Vries S. The value of (pre)school playgrounds for children's  
376 physical activity level: a systematic review. *Int Jr Behav Nutr Phys Act* 2014; 11:59.
- 377 16. Brink L, Nigg C, Lampe S, et al. Influence of schoolyard renovation on children's physical activity:  
378 The learning landscape Program. *Research and Practice* 2010; 100(9): 1672-78.
- 379 17. Corder K, Brage S, Ekelund U. Accelerometers and pedometers: methodology and clinical  
380 application. *Curr Opin Clin Nutr* 2007;10(5):597-603.
- 381 18. Blaes A, Ridgers ND, Aucouturier J, et al. Effects of a playground marking intervention on school  
382 recess physical activity in French children. *Preventive medicine* 2013;57(5):580-4.
- 383 19. Smith L, Sahlqvist S, Ogilvie D, et al. Is a change in mode of travel to school associated with a  
384 change in overall physical activity levels in children? Longitudinal results from the SPEEDY  
385 study. *Int J Behav Nutr Phy* 2012;9.
- 386 20. Truth MS, Sherwood NE, Butte NF, et al. Validity and reliability of activity measures in African-  
387 American girls for GEMS. *Med Sci Sports Exerc* 2003;35(3):532-9.
- 388 21. Goodman R. Psychometric properties of the strengths and difficulties questionnaire. *Journal of*  
389 *the American Academy of Child and Adolescent Psychiatry* 2001;40(11):1337-45.

1  
2  
3 390  
4  
5 391  
6  
7  
8 392  
9  
10  
11  
12  
13  
14  
15  
16  
17  
18  
19  
20  
21  
22  
23  
24  
25  
26  
27  
28  
29  
30  
31  
32  
33  
34  
35  
36  
37  
38  
39  
40  
41  
42  
43  
44  
45  
46  
47  
48  
49  
50  
51  
52  
53  
54  
55  
56  
57  
58  
59  
60

For peer review only

1  
2  
3  
4  
5  
6  
7  
8  
9  
10  
11  
12  
13  
14  
15  
16  
17  
18  
19  
20  
21  
22  
23  
24  
25  
26  
27  
28  
29  
30  
31  
32  
33  
34  
35  
36  
37  
38  
39  
40  
41  
42  
43  
44  
45  
46  
47  
48  
49  
50  
51  
52  
53  
54  
55  
56  
57  
58  
59  
60

Figure 1: Example of new playground designs

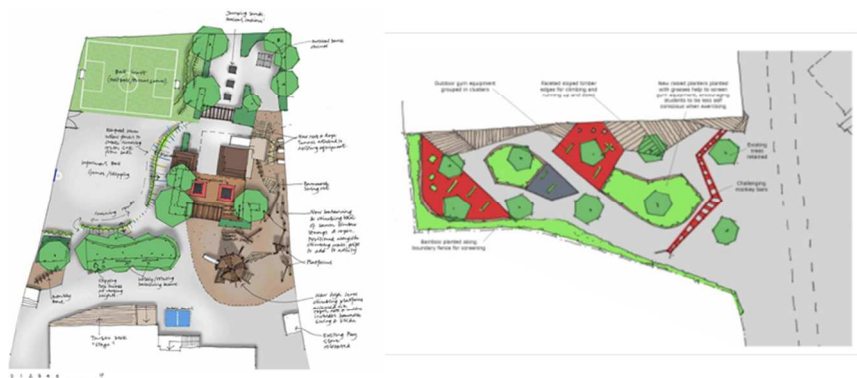

254x190mm (96 x 96 DPI)

Review only

1  
2  
3  
4  
5  
6  
7  
8  
9  
10  
11  
12  
13  
14  
15  
16  
17  
18  
19  
20  
21  
22  
23  
24  
25  
26  
27  
28  
29  
30  
31  
32  
33  
34  
35  
36  
37  
38  
39  
40  
41  
42  
43  
44  
45  
46  
47  
48  
49  
50  
51  
52  
53  
54  
55  
56  
57  
58  
59  
60

Figure Two: Overview of study design

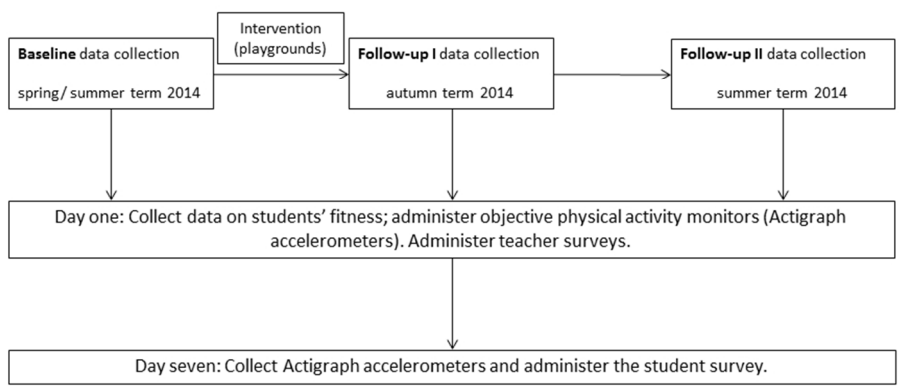

254x190mm (96 x 96 DPI)

ew only

## STROBE Statement—checklist of items that should be included in reports of observational studies

|                              | Item No | Recommendation                                                                                                                                                                                                                                                                                                                    |
|------------------------------|---------|-----------------------------------------------------------------------------------------------------------------------------------------------------------------------------------------------------------------------------------------------------------------------------------------------------------------------------------|
| Title and abstract           | 1       | (a) Indicate the study's design with a commonly used term in the title or the abstract<br><b>YES</b>                                                                                                                                                                                                                              |
|                              |         | (b) Provide in the abstract an informative and balanced summary of what was done and what was found<br><b>YES</b>                                                                                                                                                                                                                 |
| <b>Introduction</b>          |         |                                                                                                                                                                                                                                                                                                                                   |
| Background/rationale         | 2       | Explain the scientific background and rationale for the investigation being reported<br><b>YES</b>                                                                                                                                                                                                                                |
| Objectives                   | 3       | State specific objectives, including any prespecified hypotheses<br><b>YES</b>                                                                                                                                                                                                                                                    |
| <b>Methods</b>               |         |                                                                                                                                                                                                                                                                                                                                   |
| Study design                 | 4       | Present key elements of study design early in the paper<br><b>YES</b>                                                                                                                                                                                                                                                             |
| Setting                      | 5       | Describe the setting, locations, and relevant dates, including periods of recruitment, exposure, follow-up, and data collection<br><b>YES</b>                                                                                                                                                                                     |
| Participants                 | 6       | (a) <i>Cohort study</i> —Give the eligibility criteria, and the sources and methods of selection of participants. Describe methods of follow-up<br><b>YES</b>                                                                                                                                                                     |
|                              |         | <i>Case-control study</i> —Give the eligibility criteria, and the sources and methods of case ascertainment and control selection. Give the rationale for the choice of cases and controls<br><i>Cross-sectional study</i> —Give the eligibility criteria, and the sources and methods of selection of participants<br><b>YES</b> |
|                              |         | (b) <i>Cohort study</i> —For matched studies, give matching criteria and number of exposed and unexposed<br><i>Case-control study</i> —For matched studies, give matching criteria and the number of controls per case<br><b>NA</b>                                                                                               |
|                              |         |                                                                                                                                                                                                                                                                                                                                   |
| Variables                    | 7       | Clearly define all outcomes, exposures, predictors, potential confounders, and effect modifiers. Give diagnostic criteria, if applicable<br><b>YES</b>                                                                                                                                                                            |
| Data sources/<br>measurement | 8*      | For each variable of interest, give sources of data and details of methods of assessment (measurement). Describe comparability of assessment methods if there is more than one group<br><b>YES</b>                                                                                                                                |
| Bias                         | 9       | Describe any efforts to address potential sources of bias<br><b>YES</b>                                                                                                                                                                                                                                                           |
| Study size                   | 10      | Explain how the study size was arrived at<br><b>YES</b>                                                                                                                                                                                                                                                                           |
| Quantitative variables       | 11      | Explain how quantitative variables were handled in the analyses. If applicable, describe which groupings were chosen and why<br><b>YES</b>                                                                                                                                                                                        |

|    |                     |    |                                                                                            |
|----|---------------------|----|--------------------------------------------------------------------------------------------|
| 1  |                     |    |                                                                                            |
| 2  | Statistical methods | 12 | (a) Describe all statistical methods, including those used to control for confounding      |
| 3  |                     |    | YES                                                                                        |
| 4  |                     |    | _____                                                                                      |
| 5  |                     |    | (b) Describe any methods used to examine subgroups and interactions                        |
| 6  |                     |    | NA                                                                                         |
| 7  |                     |    | _____                                                                                      |
| 8  |                     |    | (c) Explain how missing data were addressed                                                |
| 9  |                     |    | NA                                                                                         |
| 10 |                     |    | _____                                                                                      |
| 11 |                     |    | (d) <i>Cohort study</i> —If applicable, explain how loss to follow-up was addressed        |
| 12 |                     |    | <i>Case-control study</i> —If applicable, explain how matching of cases and controls was   |
| 13 |                     |    | addressed                                                                                  |
| 14 |                     |    | <i>Cross-sectional study</i> —If applicable, describe analytical methods taking account of |
| 15 |                     |    | sampling strategy                                                                          |
| 16 |                     |    | NA                                                                                         |
| 17 |                     |    | _____                                                                                      |
| 18 |                     |    | (e) Describe any sensitivity analyses                                                      |

Continued on next page

For peer review only



1  
2  
3  
4  
5  
6  
7  
8  
9  
10  
11  
12  
13  
14  
15  
16  
17  
18  
19  
20  
21  
22  
23  
24  
25  
26  
27  
28  
29  
30  
31  
32  
33  
34  
35  
36  
37  
38  
39  
40  
41  
42  
43  
44  
45  
46  
47  
48  
49  
50  
51  
52  
53  
54  
55  
56  
57  
58  
59  
60**Results**

|                   |     |                                                                                                                                                                                                              |     |
|-------------------|-----|--------------------------------------------------------------------------------------------------------------------------------------------------------------------------------------------------------------|-----|
| Participants      | 13* | (a) Report numbers of individuals at each stage of study—eg numbers potentially eligible, examined for eligibility, confirmed eligible, included in the study, completing follow-up, and analysed            | NA  |
|                   |     | (b) Give reasons for non-participation at each stage                                                                                                                                                         | NA  |
|                   |     | (c) Consider use of a flow diagram                                                                                                                                                                           | NA  |
| Descriptive data  | 14* | (a) Give characteristics of study participants (eg demographic, clinical, social) and information on exposures and potential confounders                                                                     | NA  |
|                   |     | (b) Indicate number of participants with missing data for each variable of interest                                                                                                                          | NA  |
|                   |     | (c) <i>Cohort study</i> —Summarise follow-up time (eg, average and total amount)                                                                                                                             | YES |
| Outcome data      | 15* | <i>Cohort study</i> —Report numbers of outcome events or summary measures over time                                                                                                                          | NA  |
|                   |     | <i>Case-control study</i> —Report numbers in each exposure category, or summary measures of exposure                                                                                                         | NA  |
|                   |     | <i>Cross-sectional study</i> —Report numbers of outcome events or summary measures                                                                                                                           | NA  |
| Main results      | 16  | (a) Give unadjusted estimates and, if applicable, confounder-adjusted estimates and their precision (eg, 95% confidence interval). Make clear which confounders were adjusted for and why they were included | NA  |
|                   |     | (b) Report category boundaries when continuous variables were categorized                                                                                                                                    | NA  |
|                   |     | (c) If relevant, consider translating estimates of relative risk into absolute risk for a meaningful time period                                                                                             | NA  |
| Other analyses    | 17  | Report other analyses done—eg analyses of subgroups and interactions, and sensitivity analyses                                                                                                               | NA  |
| <b>Discussion</b> |     |                                                                                                                                                                                                              |     |
| Key results       | 18  | Summarise key results with reference to study objectives                                                                                                                                                     | NA  |
| Limitations       | 19  | Discuss limitations of the study, taking into account sources of potential bias or imprecision. Discuss both direction and magnitude of any potential bias                                                   | YES |
| Interpretation    | 20  | Give a cautious overall interpretation of results considering objectives, limitations, multiplicity of analyses, results from similar studies, and other relevant evidence                                   | NA  |
| Generalisability  | 21  | Discuss the generalisability (external validity) of the study results                                                                                                                                        | NA  |

**Other information**

---

Funding 22 Give the source of funding and the role of the funders for the present study and, if applicable, for the original study on which the present article is based

**YES**

\*Give information separately for cases and controls in case-control studies and, if applicable, for exposed and unexposed groups in cohort and cross-sectional studies.

**Note:** An Explanation and Elaboration article discusses each checklist item and gives methodological background and published examples of transparent reporting. The STROBE checklist is best used in conjunction with this article (freely available on the Web sites of PLoS Medicine at <http://www.plosmedicine.org/>, Annals of Internal Medicine at <http://www.annals.org/>, and Epidemiology at <http://www.epidem.com/>). Information on the STROBE Initiative is available at [www.strobe-statement.org](http://www.strobe-statement.org).

# BMJ Open

## Camden Active Spaces: Does the Construction of Active School Playgrounds Influence Children's Physical Activity Levels? A Longitudinal Quasi-Experiment Protocol

|                                 |                                                                                                                                                                                                                                                                                                                                                                                                                                                                                                                                                         |
|---------------------------------|---------------------------------------------------------------------------------------------------------------------------------------------------------------------------------------------------------------------------------------------------------------------------------------------------------------------------------------------------------------------------------------------------------------------------------------------------------------------------------------------------------------------------------------------------------|
| Journal:                        | <i>BMJ Open</i>                                                                                                                                                                                                                                                                                                                                                                                                                                                                                                                                         |
| Manuscript ID:                  | bmjopen-2014-005729.R2                                                                                                                                                                                                                                                                                                                                                                                                                                                                                                                                  |
| Article Type:                   | Protocol                                                                                                                                                                                                                                                                                                                                                                                                                                                                                                                                                |
| Date Submitted by the Author:   | 29-Jul-2014                                                                                                                                                                                                                                                                                                                                                                                                                                                                                                                                             |
| Complete List of Authors:       | Smith, Lee; University College London, Epidemiology and Public Health<br>Kipps, Courtney; University College London Hospital, Institute of Sport, Exercise and Health<br>Aggio, Daniel; University College London, Epidemiology and Public Health<br>Fox, Paul; Camden Borough Council,<br>Robinson, Nigel; Camden Borough Council,<br>Trend, Verena; Camden Borough Council,<br>Munnery, Suzie; Camden Borough Council,<br>Kelly, Barry; Camden and Islington Public Health,<br>Hamer, Mark; University College London, Epidemiology and Public Health |
| <b>Primary Subject Heading</b>: | Public health                                                                                                                                                                                                                                                                                                                                                                                                                                                                                                                                           |
| Secondary Subject Heading:      | Paediatrics                                                                                                                                                                                                                                                                                                                                                                                                                                                                                                                                             |
| Keywords:                       | PREVENTIVE MEDICINE, PUBLIC HEALTH, SPORTS MEDICINE                                                                                                                                                                                                                                                                                                                                                                                                                                                                                                     |
|                                 |                                                                                                                                                                                                                                                                                                                                                                                                                                                                                                                                                         |

SCHOLARONE™  
Manuscripts

only

1  
2  
3 1  
4  
5  
6 2

**Camden Active Spaces: Does the Construction of Active School Playgrounds Influence  
Children's Physical Activity Levels? A Longitudinal Quasi-Experiment Protocol**

7  
8  
9 3  
10  
11  
12 4  
13  
14

5 Lee Smith\*, Health Behaviour Research Centre, Department of Epidemiology and Public  
6 Health, University College London, London, UK, WC1E 6BT; [lee.smith@ucl.ac.uk](mailto:lee.smith@ucl.ac.uk); 020 7679  
7 1812

8 Courtney Kipps, Institute Sport Exercise and Health, University College London Hospital,  
9 London, UK

10 Daniel Aggio, Physical Activity Research Group, Department of Epidemiology and Public  
11 Health, London, UK

12 Paul Fox, Camden Borough Council, London, UK

13 Nigel Robinson, Camden Borough Council, London, UK

14 Verena Trend, Camden Borough Council, London, UK

15 Suzie Munnery, Camden Borough Council, London, UK

16 Barry Kelly, Camden and Islington Public Health, London, UK

17 Mark Hamer, Physical Activity Research Group, Department of Epidemiology and Public  
18 Health, London, UK

19 \*Corresponding author

1  
2  
3 20 **Key words: physical activity/ active play/ children/ school/ environment**  
4  
5

6 21 **Word count: 2317**  
7  
8  
9  
10 22  
11  
12  
13 23  
14  
15  
16 24  
17  
18  
19 25  
20  
21  
22 26  
23  
24  
25 27  
26  
27  
28 28  
29  
30  
31 29  
32  
33  
34 30  
35  
36  
37 31  
38  
39  
40 32  
41  
42  
43 33  
44  
45  
46 34  
47  
48  
49 35  
50  
51  
52 36  
53  
54  
55 37  
56  
57  
58  
59  
60

For peer review only

1  
2  
3 38  
4  
56 39 **INTRODUCTION**  
7  
8

9 40 Physical activity is essential for every facet of children's health. However, physical activity  
10  
11 41 levels in British children are low. The school environment is a promising setting to increase  
12  
13 42 children's physical activity but limited empirical evidence exists on how a change in the  
14  
15 43 outdoor physical school environment influences physical activity behaviour. London  
16  
17 44 Borough of Camden is re-designing seven existing school playgrounds to engage children to  
18  
19 45 become more physically active.  
20  
21

22  
23  
24 46 The primary aim of this project is to evaluate the impact of the re-designed playgrounds on  
25  
26 47 children's physical activity, wellbeing, and physical function/fitness.  
27  
28

29 48  
30  
3132 49 **METHOD AND ANALYSIS**  
33  
34

35  
36 50 This project will use a longitudinal quasi-experimental design. Seven experimental schools  
37  
38 51 and one control school will take part. One baseline data collection session and two follow-  
39  
40 52 ups will be carried out. Between baseline and follow-up the experimental school  
41  
42 53 playgrounds will be re-designed. At baseline, a series of fitness tests, anthropometric and  
43  
44 54 questionnaire measurements, and 7 day objective physical activity monitoring (Actigraph  
45  
46 55 accelerometer) will be carried out on children (aged 5 to 16 years). This will be repeated at  
47  
48 56 follow-up. Changes in overall physical activity levels and levels during different times of the  
49  
50 57 day (eg, school breaks) will be examined. Multilevel regression modelling will be used to  
51  
52 58 analyse the data.  
53  
54  
55  
56  
57

58 59  
59  
60

1  
2  
3 60  
4  
5  
6  
7 61

## 61 ETHICS AND DISSEMINATION

8  
9 62 The results of this study will be disseminated through peer-review publications and scientific  
10  
11 63 presentations. Ethical approval was obtained through the University College London  
12  
13  
14 64 Research Ethics Committee (Reference number: 4400/002).  
15  
16  
17 65  
18  
19  
20 66  
21  
22  
23 67  
24  
25  
26 68  
27  
28  
29 69  
30  
31  
32 70  
33  
34  
35 71  
36  
37  
38 72  
39  
40  
41 73  
42  
43  
44 74  
45  
46  
47 75  
48  
49  
50 76  
51  
52  
53 77  
54  
55  
56  
57  
58  
59  
60

78

79 **INTRODUCTION**

80 Physical activity is essential for every facet of children's (aged 5 to 16 years) health. For  
81 example, higher levels of physical activity in children are associated with more favourable  
82 cardiovascular disease risk factors whereas excessive levels of sedentary behaviour have the  
83 reverse effect.[1,2] Physical activity can also benefit psychological health by aiding in the  
84 prevention of anxiety and depressive symptoms and contributing to the improvement of  
85 self-esteem.[3] Importantly, rather than detracting from learning, more physical activity and  
86 breaks from sitting in school are thought to enhance cognitive function and academic  
87 performance.[4] It is also more likely that active children will become active adults, since  
88 some tracking of physical activity behaviour has been observed from childhood to  
89 adulthood.[5] However, in westernised countries current levels of physical activity in  
90 children are low as there are increasing opportunities to participate in sedentary  
91 activities.[6,7] For example, it is recommended that children engage in physical activity of  
92 moderate intensity for at least one hour a day, to maintain good health.[8] However, just  
93 24% of British girls and 32% of boys achieve this recommendation.[7] Physical inactivity is  
94 estimated to cost the NHS approximately £8 billion per year in health care costs alone.[8]  
95 Encouraging physically active lifestyles in children is therefore crucial in nurturing a healthy  
96 future generation of adults.

97 A recent meta-analysis found that the effects of interventions to increase physical activity in  
98 children have been, at best, modest, and concluded that alternative approaches are  
99 required.[9] In the UK, children spend approximately 60% of their weekday in school where  
100 physical activity levels, particularly in girls, are low.[10,11] Environments both facilitate and



1  
2  
3 101 provide the arena for physical activity [12]. Interventions that target the school environment  
4  
5 102 may offer great opportunity to increase physical activity levels. However, there is little  
6  
7 103 robust empirical evidence concerning the effect of changing the physical environment on  
8  
9 104 activity levels in children. Emerging data has suggested that a positive perception of the  
10  
11 105 school play environment was associated with higher levels of moderate-vigorous physical  
12  
13 106 activity (MVPA) during playtime.[13] Moreover, the number of permanent play facilities in  
14  
15 107 school playgrounds has been found to be associated with higher physical activity levels.[14]  
16  
17 108 A recent review [15] on the value of playgrounds for children’s physical activity identified 13  
18  
19 109 experimental studies, which have produced mixed findings, likely owing to differences in  
20  
21 110 intervention design. For example, the review identified that reducing playground density  
22  
23 111 increased physical activity levels, but the provision of play equipment produced mixed  
24  
25 112 effects, whereas no effects were found on the provision of playground markings and  
26  
27 113 promotion of physical activity by teachers. Just one study investigated the impact of “major”  
28  
29 114 playground reconstruction on children’s physical activity behaviour [16] and concluded  
30  
31 115 renovated schoolyards to promote physical activity may increase the number of children  
32  
33 116 who are physically active and may reduce sedentary behaviours. However, physical activity  
34  
35 117 data was collected using direct observation during the school day, only. This limits the ability  
36  
37 118 to examine carry over effects outside the school environment (ie, at weekends and during  
38  
39 119 evenings). Taken together, the emerging evidence suggests that the physical environment  
40  
41 120 could play an important role in children’s physical activity behaviour, but more robust  
42  
43 121 evidence is required.  
44  
45  
46  
47  
48  
49  
50  
51  
52  
53  
54  
55  
56  
57  
58  
59  
60

1  
2  
3 123 Increasing physical activity levels is well established as a way to improve fitness and health  
4  
5 124 outcomes in young people. Strong's et al. [1] review identified 17 experimental studies that  
6  
7 125 aimed to increase levels of physical activity, and these all found improvements in aerobic  
8  
9  
10 126 fitness. Two experimental studies implemented programs of moderately intense exercise 30  
11  
12 127 to 60 minutes in duration, 3 to 7 days per week, and this led to a reduction in total body  
13  
14 128 adiposity in overweight young people. Interestingly, the review also identified three  
15  
16  
17 129 longitudinal and two experimental studies in young people that showed physical activity or  
18  
19  
20 130 strength training improved muscular strength and endurance. It is plausible to assume that  
21  
22 131 an increase in movement and a decrease in sedentary behaviour may result in an increase in  
23  
24 132 hamstring flexibility. This is important as maintaining hamstring flexibility may prevent acute  
25  
26  
27 133 and chronic musculoskeletal injuries.[17] There is also evidence that physical activity is  
28  
29 134 associated with scores on a scale (The Strengths and Difficulties Questionnaire) measuring  
30  
31 135 mental wellbeing (eg, happiness, behaviour, concentration, self-esteem etc).[18] On this  
32  
33  
34 136 basis we hypothesise that a change in the physical school playground environment which  
35  
36 137 increases levels of physical activity or reduces sedentary behaviour should subsequently  
37  
38 138 improve fitness and health outcomes.

39  
40  
41  
42 139

43  
44  
45 140 A recent study found that engaging in 40% of moderate-intensity physical activity during  
46  
47 141 school playtime equated to 34 minutes of daily MVPA.[19] This exceeds the *minimum*  
48  
49 142 recommendation of 30 minutes of at least moderate-intensity physical activity for children's  
50  
51 143 good health.[20] It has been suggested that this guideline is a realistic target for children to  
52  
53  
54 144 achieve during school playtime,[21] especially if a playground has been modified to  
55  
56  
57 145 encourage physical activity.

1  
2  
3 146  
4  
5

6 147 **SETTING**  
7  
8

9 148 Camden Borough Council is re-designing seven existing school playgrounds (five primary schools and  
10  
11 149 two secondary schools), that are thought not to be conducive to physical activity/ active play, with  
12  
13 150 exciting bespoke features to engage children to become more active. Each school will receive a  
14  
15 151 unique playground design, for example displayed in Figure 1. Example features include new  
16  
17 152 Astroturf games pitches, climbing frames, trampolines, monkey bars, and outdoor gyms, which have  
18  
19 153 been designed based on themes (eg, ancient ruins, volcanoes, clouds etc.) emerging from qualitative  
20  
21 154 work with children and teachers in each school. The research team did not carry out the qualitative  
22  
23 155 work nor did they provide input into the design of the playgrounds. The qualitative work and the  
24  
25 156 design of the playgrounds were carried out by two private organisations specialising in playground  
26  
27 157 design. Camden Council's underlying goal is to encourage participation by creating  
28  
29 158 opportunities for physical activity outside of traditional sports or team competition. This  
30  
31 159 presents a unique opportunity to evaluate the impact of these structures on children's  
32  
33 160 physical activity, health and wellbeing outcomes while addressing previous limitations in the  
34  
35 161 literature (ie, collecting activity only in school).  
36  
37  
38  
39  
40  
41  
42  
43  
44  
45  
46  
47  
48  
49  
50  
51  
52  
53  
54

162

163 We hypothesise that the new play grounds will increase young peoples' time spent in both light and  
164 moderate-to-vigorous physical activity and reduce sedentary behaviour during break time, and  
165 consequently improve levels of general fitness (eg, grip and leg strength, peak flow and adiposity).  
55

166

56 167 **AIMS**  
57  
58  
59  
60

1  
2  
3 168 The *Camden Active Spaces* project consists of two key elements; 1) redesign of the school  
4  
5 169 playgrounds; 2) evaluation of the hypothesised benefits. In the present paper we focus on  
6  
7  
8 170 the evaluation only. Thus, the primary aim of this project is to evaluate the impact of the re-  
9  
10 171 designed playgrounds on children's physical activity, wellbeing, and physical  
11  
12 172 function/fitness.  
13  
14  
15  
16 173  
17  
18  
19 174 **METHOD AND ANALYSES**

20  
21  
22 175 The evaluation of *Camden Active Spaces* will use a longitudinal quasi-experimental design.  
23  
24 176 Baseline data collection will take place in the Spring/Summer term 2014, follow-up I data  
25  
26 177 collection will take place during the Autumn term 2014, and follow-up II during the Summer  
27  
28 178 term of 2015 (see Figure 2). Between baseline and follow-up I (school summer holidays) the  
29  
30 179 school playgrounds will be re-designed. A second follow-up will allow us to investigate if  
31  
32 180 short-term effects of the intervention (if they exist) are sustained over a longer period. This  
33  
34 181 evaluation has been funded by the Economic and Social Research Council, UK  
35  
36 182 (ES/M003795/1), whilst the core project (playground redesign) has been funded by Camden  
37  
38 183 Clinical Commissioning Group and London Borough of Camden. Ethical approval was  
39  
40 184 granted by the University College London Research Ethics Committee (4400/002).  
41  
42  
43  
44  
45  
46 185  
47  
48  
49 186 **Inclusion criteria**

50  
51  
52 187 *School inclusion criteria*  
53  
54  
55  
56  
57  
58  
59  
60

1  
2  
3 188 Seven schools located in the London Borough of Camden have been selected to receive the  
4  
5 189 re-designed playgrounds and all seven schools have agreed to take part in the study.  
6  
7

8  
9 190

10  
11 191 In addition to the seven experimental schools one control school will be recruited into the study.  
12  
13 192 This school will be located in the London Borough of Camden and it will not be receiving a new  
14  
15 193 playground design, moreover, it will not differ from experimental schools based on student  
16  
17 194 demographics or school policy. Owing to resources it is only feasible to collect data from a single  
18  
19 195 control school. The authors acknowledge that an equal number of controls to experimental schools  
20  
21 196 would allow for a more robust experimental design.  
22  
23

24  
25 197 *Participant Inclusion criteria*  
26  
27

28 198 We aim to randomly select approximately 100 children (see below power calculation) evenly  
29  
30 199 distributed across school year groups (aged 5 to 11 years in primary school and aged 11 to  
31  
32 200 16 years in secondary school) from each of the eight schools (total sample size 800).  
33  
34 201 Children aged 17 to 18 years or any school leavers in 2014 will not be asked to participate in  
35  
36 202 the current project, owing to time table restrictions due to final exams and potential loss to  
37  
38 203 follow up. Students whose parents have not opted them out of the study will be eligible to  
39  
40 204 participate (see section Ethics and Dissemination for details on obtaining consent).  
41  
42  
43  
44

45  
46 205

47  
48  
49 206 **Recruitment**  
50  
51

52 207 The seven schools who will be receiving the redesigned playgrounds have previously been  
53  
54 208 recruited into the study by Camden Borough Council. To recruit children into the study  
55  
56 209 presentations will be given to each year group within each school, during assemblies. The  
57  
58  
59  
60

1  
2  
3 210 presentations will disseminate information on *Camden Active Spaces*, what would be  
4  
5 211 involved if children were to take part in the study and benefits of the study to children and  
6  
7 212 the school. At the end of the presentations children will be given participant study  
8  
9  
10 213 information sheets. In order to make parents aware of the study a parent information sheet  
11  
12 214 will be emailed to all parents (translated into different languages where required), posted  
13  
14 215 on the school webpage, in addition to hard copies being made available at the school. In an  
15  
16 216 attempt to maximise response rates and adherence to protocol, each child who completes  
17  
18 217 the wear protocol will be awarded a one-month free swimming voucher and entered into a  
19  
20 218 prize draw to win an iPod Touch (one iPod Touch will be awarded per school). All schools  
21  
22 219 taking part in the study will be entered into a separate prize draw to win one of two  
23  
24  
25  
26 220 Nintendo Wiis.

27  
28  
29  
30 221

31  
32  
33 222 **Procedures**

34  
35  
36 223 Data collection procedures will take place over a period of 12 months. A team of trained  
37  
38 224 researchers will collect data from each school on a date and time that is convenient for the  
39  
40 225 school. Children will be invited to take part in data collection. Data collection sessions will  
41  
42 226 last approximately 30 minutes. A series of fitness tests and anthropometric measurements  
43  
44 227 will be carried out on children, in an appropriate room in the school (e.g. sports or assembly  
45  
46 228 hall). Once fitness tests and anthropometric measurements have been completed objective  
47  
48 229 devices (accelerometers) will be given to children to monitor their physical activity  
49  
50 230 behaviour. Between four and seven days of accelerometer data are needed to provide a  
51  
52 231 reliable estimate of habitual physical activity.[22] Thus participants will be asked to wear  
53  
54  
55 232 objective devices for 7 consecutive days. On day seven participants will return the device to  
56  
57  
58  
59  
60

1  
2  
3 233 research staff at the school where they will then complete a questionnaire on their physical  
4  
5 234 activity behaviour. This exact process will be repeated at follow-up I and follow-up II.  
6  
7  
8  
9

10  
11  
12 235

## 13 14 15 236 **Measurement and instruments**

### 16 17 237 *Accelerometer*

18 238 It is now recognised that accelerometers provide the most reliable and valid measurement  
19  
20 239 of activity in children [16] and are considered the gold standard approach. These wearable  
21  
22 240 motion sensors measure movement across three dimensions, thus providing minute-by-  
23  
24 241 minute time-stamped data on activity intensity, duration, and patterns across the day.

25  
26 242 Objective physical activity monitoring has been successfully used in similar study settings to  
27  
28 243 the present project.[14,23, 24]

29  
30 244 The present evaluation will use the Actigraph GT3X accelerometer. This device is validated  
31  
32 245 and has been used in other studies with primary and high school children (see for example:  
33  
34 246 [www.iconnect.co.uk](http://www.iconnect.co.uk) and <http://www.cedar.iph.cam.ac.uk/research/directory/speedy/>). The

35  
36 247 Actigraph GT3X is worn on a belt around the waist with the device itself positioned above  
37  
38 248 the right hip either over or under clothing. We will employ a sampling frequency of 30 hz.

39  
40 249 Children will be asked to wear the device during waking hours every day for seven  
41  
42 250 consecutive days, but not during water-based activities or sleep.  
43  
44  
45  
46  
47  
48

49  
50 251

### 51 52 53 252 *Fitness Tests*

54  
55  
56  
57  
58  
59  
60

1  
2  
3 253 A series of fitness tests will be carried out, following Standard Operating Procedure Forms,  
4  
5 254 on all children taking part in the study. Four fitness tests will be carried out to measure  
6  
7 255 aspects of general fitness: participants will be asked to perform the hand held  
8  
9  
10 256 Dynamometer test to assess grip strength, the standing horizontal jump test to assess leg  
11  
12 257 power, the peak flow test to assess lung function, and the sit-and-reach test to assess  
13  
14 258 flexibility. Participants' weight and body composition will be measured using the Tanita SC-  
15  
16  
17 259 330 Body Composition Analyser (Tanita Inc, IL, USA) and height will be measured using the  
18  
19 260 Leicester Height Measure, from which BMI will be calculated  $\text{kg/m}^2$ . These tests have been  
20  
21 261 extensively used in previous cohort studies of young people (eg,  
22  
23 262 <http://www.chasestudy.ac.uk/study-measurement>) and have shown good validity and  
24  
25 263 reliability in young people across broad age groups (<http://www.chasestudy.ac.uk/study->  
26  
27 264 measurement). [25-27]  
28  
29  
30  
31  
32  
33  
34

### 35 266 *Questionnaires*

36  
37  
38 267 All children taking part in the study will be asked to complete a questionnaire. The  
39  
40 268 questionnaire will take approximately ten minutes to complete and includes questions on  
41  
42 269 standard demographics and physical activity, as well as potentially important correlates of  
43  
44 270 physical activity. Teaching assistants and research staff will assist all children in completing  
45  
46 271 questionnaires.  
47  
48  
49  
50

51 272 The Girls Health Enrichment Multi-Studies (GEMS) physical activity survey has been  
52  
53 273 embedded within the questionnaire to give a subjective measure of physical activity and  
54  
55 274 provide an understanding of which specific physical activity behaviours are influenced by  
56  
57  
58  
59  
60



1  
2  
3 275 the playground redesign, if any. GEMS has validity and reliability equivalent to other self-  
4  
5 276 report measures of physical activity [28] and was deemed suitable for both primary and high  
6  
7 277 school boys and girls by those who designed the present study, owing to its simplicity. The  
8  
9  
10 278 questionnaire also includes items on travel mode (as used in the iConnect Study;  
11  
12 279 [www.iconnect.co.uk](http://www.iconnect.co.uk)).

13  
14  
15 280 Teachers will be asked to complete the validated Strengths and Difficulties  
16  
17 281 questionnaire;[29] this questionnaire provides a measure of children's behaviour, mental  
18  
19 282 health, engagement and well-being and takes approximately five minutes to complete per  
20  
21 283 child.

22  
23  
24  
25  
26 284 Each school has one Head Teacher. Head Teachers (n=8) will be asked to complete a  
27  
28 285 questionnaire to allow for an understanding of differences between schools on "playground  
29  
30 286 policy." Questions include, "During what type of weather are children not allowed to go  
31  
32 287 outside during scheduled breaks (i.e. rain/ snow)?" "Are any sections of the current  
33  
34 288 playground out of use during bad weather (i.e. school field when raining), if yes please  
35  
36 289 specify?" "When children cannot go outside on scheduled breaks, owing to bad weather,  
37  
38 290 where do they spend their break?" and "Are there any current initiatives/programs to  
39  
40 291 promote physical activity and/or healthy lifestyles in your school, if yes please specify?"  
41  
42  
43  
44 292 Head teachers will be asked to complete an identical survey at follow-up to allow for the  
45  
46 293 assessment of changes in "playground policy" between each time point.

47  
48  
49  
50 294

51  
52  
53 295 **ANALYSIS**

54  
55  
56 296 *Outcome*  
57  
58  
59  
60

1  
2  
3 297 The primary outcome for this study will be change in average daily time spent in MVPA as  
4  
5 298 recorded by the Actigraph accelerometer. In addition the study has been designed to collect  
6  
7 299 the following secondary outcomes using participant questionnaires and objective measures  
8  
9  
10 300 (1) change in average daily time spent sedentary, (2) change in average daily time spent in  
11  
12 301 light and vigorous activity at different times of the day (playtimes at school, leisure time at  
13  
14 302 home), (3) change in peak flow, sit-and-reach, grip strength, standing horizontal jump, and  
15  
16 303 body mass index (BMI)/body composition, (4) change in Strength and Difficulties scores.  
17  
18  
19  
20  
21 304

22  
23 305 *Quantitative analysis*

24  
25  
26 306 Raw data files will be extracted from each Actigraph device and processed using bespoke  
27  
28 307 software (Actilife) to quantify a range of features that will directly contribute to the  
29  
30 308 determination of active and sedentary time. We intend to follow methods used in the  
31  
32 309 International Children's Accelerometry Database study that incorporated children aged 4-18  
33  
34 310 yrs old [2]. Briefly, data files will be reintegrated to a 60-second epoch and non-wear time  
35  
36 311 defined as 60 minutes of consecutive zeros, allowing for 2 minutes of non-zero  
37  
38 312 interruptions. All children with at least 1 day with at least 500 minutes of measured monitor  
39  
40 313 wear time between 7 AM and midnight will be included. Total physical activity will be  
41  
42 314 expressed as total counts, including sedentary minutes, divided by measured time per day  
43  
44 315 (counts/min, cpm). Time spent sedentary will be defined as all minutes showing less than  
45  
46 316 100 cpm and MVPA time as minutes showing more than 3000 cpm. Multilevel modelling will  
47  
48 317 be used to analyse the data. This approach offers several advantages over simple regression  
49  
50 318 models. We will be able to model changes in activity over the three assessment periods  
51  
52 319 accounting for the inter-individual as well as intra-individual differences.  
53  
54  
55  
56  
57  
58  
59  
60

1  
2  
3 320  
4  
5  
6

7 321 *Sample size*

8  
9  
10 322 A previous school based intervention to examine the effects of changes in playground  
11 323 structure on physical activity [23] demonstrated a small effect size ( $d = 0.10$ ). Thus, based on  
12 324 these data, a sample size of  $N=458$  would provide us with 80% power at 5% significance  
13 325 level to detect small differences in moderate intensity physical activity using a repeated  
14 326 measures design (calculated using G-Power). We will aim to recruit 100 children from each  
15 327 school to allow for dropout and incomplete Actigraph data.  
16  
17  
18  
19  
20  
21  
22  
23  
24  
25  
26  
27

28 328

#### 29 329 **LIMITATIONS**

30 330

31 331 It is not possible to carry out a multicentre cluster randomised-controlled-trial. Key limitations of this  
32 332 study include a quasi-experimental design with non-randomly selected control participants and the  
33 333 recruitment of one control school.  
34  
35  
36  
37  
38  
39  
40  
41  
42

43 334

#### 44 335 **ETHICAL CONSIDERATION AND DISSEMINATION**

45  
46 336 Firstly, head teachers from each school will be asked to provide explicit written consent for  
47 337 their schools and school children to take part in the study. Next, if parents (of primary and  
48 338 secondary school children) do not want their child(ren) to take part in the study they will be  
49 339 given the option to “opt-out” their child(ren), instructions to parents on how to opt-out  
50 340 their child(ren) are provided in the parent study information sheet. Prior to data collection  
51 341 all high school (not primary school) children will be asked to provide explicit written assent.  
52  
53  
54  
55  
56  
57  
58  
59  
60

1  
2  
3 342 The findings from this study will be disseminated to academic researchers and to  
4  
5 343 policymakers through several mechanisms. First, we will employ the usual avenues for  
6  
7 344 dissemination of academic research, including conference presentations and journal  
8  
9 345 articles. Second, we will disseminate this research via social media outlets such as the  
10  
11 346 University College London – Physical Activity Research Group Twitter account. Third, with  
12  
13 347 Camden Council, we will include this physical activity study within the regular programme of  
14  
15 348 briefings that are presented to government departments interested in physical activity,  
16  
17 349 including the Department of Health, the Department for Communities and Local  
18  
19 350 Government, etc.  
20  
21  
22  
23  
24  
25  
26  
27

### 28 352 **Competing interests**

29  
30  
31 353 The authors declare that they have no competing interests.  
32  
33

### 34 354 **Funding**

35  
36  
37 355 This work was supported by The Economic and Social Research Council, UK (ES/M003795/1)  
38  
39

### 40 356 **Authors' contributions**

41  
42  
43 357 Lee Smith, Courtney Kipps, Daniel Aggio, Paul Fox, Nigel Robinson, Verena Trend, Suzie  
44  
45 358 Munnery, Barry Kelly, and Mark Hamer made substantial contribution to the concept and  
46  
47 359 design of the study. Lee Smith drafted the manuscript and Courtney Kipps, Daniel Aggio,  
48  
49 360 Paul Fox, Nigel Robinson, Verena Trend, Suzie Munnery, Barry Kelly, and Mark Hamer  
50  
51 361 revised it critically for important intellectual content. Lee Smith, Courtney Kipps, Daniel  
52  
53  
54  
55  
56  
57  
58  
59  
60

1  
2  
3 362 Aggio, Paul Fox, Nigel Robinson, Verena Trend, Suzie Munnery, Barry Kelly, and Mark Hamer  
4  
5 363 approved the final version of the manuscript to be published.  
6  
7  
8  
9 364  
10  
11  
12 365  
13  
14  
15 366  
16  
17

18 367 **REFERENCES**  
19

- 20  
21 368 1. Strong WB, Malina RM, Blimkie CJR, et al. Evidence based physical activity for school-age youth. J  
22 369 *Pediatr-Us* 2005;146(6):732-37.  
23 370 2. Ekelund U, Luan JA, Sherar LB, et al. Moderate to Vigorous Physical Activity and Sedentary Time  
24 371 and Cardiometabolic Risk Factors in Children and Adolescents. *Jama-J Am Med Assoc*  
25 372 2012;307(7):704-12.  
26 373 3. Centre for Diseases and Control Prevention. Physical Activity and Health. Atlanta, US.  
27 374 2013.  
28 375 4. Lees C, Hopkins J. Effect of Aerobic Exercise on Cognition, Academic Achievement, and  
29 376 Psychosocial Function in Children: A Systematic Review of Randomized Control Trials.  
30 377 *Preventing Chronic Disease* 2013;10.  
31 378 5. Telama R, Yang X, Viikari J, et al. Physical activity from childhood to adulthood: a 21-year tracking  
32 379 study. *American journal of preventive medicine* 2005;28(3):267-73.  
33 380 6. Griffiths LJ, Cortina-Borja M, Sera F, et al. How active are our children? Findings from the  
34 381 Millennium Cohort Study. *BMJ open* 2013;3(8).  
35 382 7. Joint Health Surveys Unit. The Health Survey for England 2008. The Information Centre for Health  
36 383 and Social Care, 2009, Leeds. [www.ic.nhs.uk/pubs/hse08physicalactivity](http://www.ic.nhs.uk/pubs/hse08physicalactivity)  
37 384 8. Department of Health. Start Active Stay Active: A report on physical activity for health from the  
38 385 four home countries' Chief Medical Officers (UK). July 2011.  
39 386 9. Metcalf B, Henley W, Wilkin T. Effectiveness of intervention on physical activity of children:  
40 387 systematic review and meta-analysis of controlled trials with objectively measured  
41 388 outcomes. *British Journal of Sports Medicine* 2013;47(4):226-26.  
42 389 10. Smith L, Sahlqvist S, Ogilvie D, et al. Is active travel to non-school destinations associated with  
43 390 physical activity in primary school children? *Preventive medicine* 2012;54(3-4):224-28.  
44 391 11. Nettlefold L, McKay HA, Warburton DER. The challenge of low physical activity during the school  
45 392 day: at recess, lunch and in physical education. *British Journal of Sports Medicine*  
46 393 2011;45(10):819-19.  
47 394 12. Fisher A, van Jaarsveld CHM, Llewellyn CH, et al. Environmental Influences on Children's Physical  
48 395 Activity: Quantitative Estimates Using a Twin Design. *PloS one* 2010;5(4).  
49 396 13. Yildirim M, Arundell L, Cerin E, et al. What helps children to move more at school recess and  
50 397 lunchtime? Mid-intervention results from Transform-Us! cluster-randomised controlled trial.  
51 398 *British Journal of Sports Medicine* 2014;48(3):271-77.  
52 399 14. Taylor R, Farmer V, Cameron S, et al. School playgrounds and physical activity policies as  
53 400 predictors of school and home activity. *Int Jr Behav Nutr Phys Act* 2011; 8(1):38.  
54  
55  
56  
57  
58  
59  
60

- 1  
2  
3 401 15. Broekhuizen K, Scholten A, de Vries S. The value of (pre)school playgrounds for children's  
4 402 physical activity level: a systematic review. *Int J Behav Nutr Phys Act* 2014; 11:59.  
5 403 16. Brink L, Nigg C, Lampe S, et al. Influence of schoolyard renovation on children's physical activity:  
6 404 The learning landscape Program. *Research and Practice* 2010; 100(9): 1672-78.  
7 405 17. ACSM. Guidelines for exercise testing and percription. 6<sup>th</sup> ed. Baltimore.Lippincott, Williams and  
8 406 Wilkins, 2000: 85-8.  
9 407 18. Brodersen N, Steptoe A, Williamson S, et al. Sociodemographic, developmental, environmental,  
10 408 and psychological correlates of physical activity and sedentary behaviour at age 11 to 12.  
11 409 *Ann Behav Med* 2005; 29(1): 2-11.  
12 410 19. Ridgers N, Stratton G, Fairclough S. Assessing physical activity during recess using accelerometry.  
13 411 *Prev Med* 2005; 41(1): 102-7.  
14 412 20. Biddle S, Sallis J, Cavill N (Eds). *Yound and active: physical activity guidelines for young people in*  
15 413 *the UK*, Health Education Authority, London 1998.  
16 414 21. Ridgers N, Stratton G, Fairclough S. Physical activity levels of children during school play time.  
17 415 *Sports Medicine* 2006; 36(4): 359-371.  
18 416 22. Corder K, Brage S, Ekelund U. Accelerometers and pedometers: methodology and clinical  
19 417 application. *Curr Opin Clin Nutr* 2007;10(5):597-603.  
20 418 23. Blaes A, Ridgers ND, Aucouturier J, et al. Effects of a playground marking intervention on school  
21 419 recess physical activity in French children. *Preventive medicine* 2013;57(5):580-4.  
22 420 24. Smith L, Sahlqvist S, Ogilvie D, et al. Is a change in mode of travel to school associated with a  
23 421 change in overall physical activity levels in children? Longitudinal results from the SPEEDY  
24 422 study. *Int J Behav Nutr Phy* 2012;9.  
25 423 25. Ruiz J, Castro-Pinero J, Espana-Romero, et al. Field-based fitness assessment in young people:  
26 424 the ALPHA health-related fitness test battery for children and adolescent. *British Journal of*  
27 425 *Sports Medicine* 2011; 45(6): 518-25.  
28 426 26. Ortega F, Artero E, Ruiz J, et al. Reliability of health-related physical fitness tests in European  
29 427 adolsecents. *The HELENA Study. International Journal of Obesity* 2008; 32:49-57.  
30 428 27.Kirkby J, Welsh L, Lums S, et al. The EPICure study: comparison of pediatric spirometry in  
31 429 community and laboratory settings. *Pediatric pulmonology* 2008; 43(12): 1233-41.  
32 430 28. Treuth MS, Sherwood NE, Butte NF, et al. Validity and reliability of activity measures in African-  
33 431 American girls for GEMS. *Med Sci Sports Exerc* 2003;35(3):532-9.  
34 432 29. Goodman R. Psychometric properties of the strengths and difficulties questionnaire. *Journal of*  
35 433 *the American Academy of Child and Adolescent Psychiatry* 2001;40(11):1337-45.

39 434

40 435 **Figure Legends**41 436 **Figure 1: Example of new playground designs**42 437 **Figure 2: Overview of study design**

43 438

44 439

1  
2  
3 1 **Camden Active Spaces: Does the Construction of Active School Playgrounds Influence**  
4  
5 2 **Children's Physical Activity Levels? A Longitudinal Quasi-Experiment Protocol**  
6  
7  
8  
9 3

10  
11 4 Lee Smith\*, Health Behaviour Research Centre, Department of Epidemiology and Public  
12  
13 5 Health, University College London, London, UK, WC1E 6BT; [lee.smith@ucl.ac.uk](mailto:lee.smith@ucl.ac.uk); 020 7679  
14  
15 6 1812  
16  
17

18  
19 7 Courtney Kipps, Institute Sport Exercise and Health, University College London Hospital,  
20  
21 8 London, UK  
22  
23

24  
25 9 Daniel Aggio, Physical Activity Research Group, Department of Epidemiology and Public  
26  
27 10 Health, London, UK  
28  
29

30  
31 11 Paul Fox, Camden Borough Council, London, UK  
32  
33

34  
35 12 Nigel Robinson, Camden Borough Council, London, UK  
36  
37

38  
39 13 Verena Trend, Camden Borough Council, London, UK  
40  
41

42  
43 14 Suzie Munnery, Camden Borough Council, London, Uk  
44  
45

46  
47 15 Barry Kelly, Camden and Islington Public Health, London, Uk  
48  
49

50  
51 16 Mark Hamer, Physical Activity Research Group, Department of Epidemiology and Public  
52  
53 17 Health, London, UK  
54

55  
56 18 \*Corresponding author  
57  
58

59  
60 19 **Key words: physical activity/ active play/ children/ school/ environment**

1  
2  
3  
4  
5  
6  
7  
8  
9  
10  
11  
12  
13  
14  
15  
16  
17  
18  
19  
20  
21  
22  
23  
24  
25  
26  
27  
28  
29  
30  
31  
32  
33  
34  
35  
36  
37  
38  
39  
40  
41  
42  
43  
44  
45  
46  
47  
48  
49  
50  
51  
52  
53  
54  
55  
56  
57  
58  
59  
60

20 **Word count: 2317**

21

22

23

24

25

26

27

28

29

30

31

32

33

34

35

36

37

For peer review only



1  
2  
3 38 **INTRODUCTION**  
4  
5

6 39 Physical activity is essential for every facet of children’s health. However, physical activity  
7  
8 40 levels in British children are low. The school environment is a promising setting to increase  
9  
10 41 children’s physical activity but limited empirical evidence exists on how a change in the  
11  
12 42 outdoor physical school environment influences physical activity behaviour. London  
13  
14 43 Borough of Camden is re-designing seven existing school playgrounds to engage children to  
15  
16 44 become more physically active.  
17

18  
19  
20  
21 45 The primary aim of this project is to evaluate the impact of the re-designed playgrounds on  
22  
23 46 children’s physical activity, wellbeing, and physical function/fitness.  
24  
25

26 47

27  
28  
29 48 **METHOD AND ANALYSIS**  
30  
31

32 49 This project will use a longitudinal quasi-experimental design. Seven experimental schools  
33  
34 50 and one control school will take part. One baseline data collection session and two follow-  
35  
36 51 ups will be carried out. Between baseline and follow-up the experimental school  
37  
38 52 playgrounds will be re-designed. At baseline, a series of fitness tests, anthropometric and  
39  
40 53 questionnaire measurements, and 7 day objective physical activity monitoring (Actigraph  
41  
42 54 accelerometer) will be carried out on children (aged 5 to 16 years). This will be repeated at  
43  
44 55 follow-up. Changes in overall physical activity levels and levels during different times of the  
45  
46 56 day (eg, school breaks) will be examined. Multilevel regression modelling will be used to  
47  
48 57 analyse the data.  
49  
50  
51  
52

53 58  
54  
55  
56  
57  
58 59  
59  
60

1  
2  
3  
4  
5  
6  
7  
8  
9  
10  
11  
12  
13  
14  
15  
16  
17  
18  
19  
20  
21  
22  
23  
24  
25  
26  
27  
28  
29  
30  
31  
32  
33  
34  
35  
36  
37  
38  
39  
40  
41  
42  
43  
44  
45  
46  
47  
48  
49  
50  
51  
52  
53  
54  
55  
56  
57  
58  
59  
60

60 **ETHICS AND DISSEMINATION**

61 The results of this study will be disseminated through peer-review publications and scientific  
62 presentations. Ethical approval was obtained through the University College London  
63 Research Ethics Committee (Reference number: 4400/002).

For peer review only

1  
2  
3 78 **INTRODUCTION**  
4  
5

6 79 Physical activity is essential for every facet of children's (aged 5 to 16 years) health. For  
7  
8 80 example, higher levels of physical activity in children are associated with more favourable  
9  
10 81 cardiovascular disease risk factors whereas excessive levels of sedentary behaviour have the  
11  
12 82 reverse effect.[1,2] Physical activity can also benefit psychological health by aiding in the  
13  
14 83 prevention of anxiety and depressive symptoms and contributing to the improvement of  
15  
16 84 self-esteem.[3] Importantly, rather than detracting from learning, more physical activity and  
17  
18 85 breaks from sitting in school are thought to enhance cognitive function and academic  
19  
20 86 performance.[4] It is also more likely that active children will become active adults, since  
21  
22 87 some tracking of physical activity behaviour has been observed from childhood to  
23  
24 88 adulthood.[5] However, in westernised countries current levels of physical activity in  
25  
26 89 children are low as there are increasing opportunities to participate in sedentary  
27  
28 90 activities.[6,7] For example, it is recommended that children engage in physical activity of  
29  
30 91 moderate intensity for at least one hour a day, to maintain good health.[8] However, just  
31  
32 92 24% of British girls and 32% of boys achieve this recommendation.[7] Physical inactivity is  
33  
34 93 estimated to cost the NHS approximately £8 billion per year in health care costs alone.[8]  
35  
36 94 Encouraging physically active lifestyles in children is therefore crucial in nurturing a healthy  
37  
38 95 future generation of adults.  
39  
40  
41  
42  
43  
44  
45  
46

47 96 A recent meta-analysis found that the effects of interventions to increase physical activity in  
48  
49 97 children have been, at best, modest, and concluded that alternative approaches are  
50  
51 98 required.[9] In the UK, children spend approximately 60% of their weekday in school where  
52  
53 99 physical activity levels, particularly in girls, are low.[10,11] Environments both facilitate and  
54  
55 100 provide the arena for physical activity [12]. Interventions that target the school environment  
56  
57  
58  
59  
60

1  
2  
3 101 may offer great opportunity to increase physical activity levels. However, there is little  
4  
5 102 robust empirical evidence concerning the effect of changing the physical environment on  
6  
7 103 activity levels in children. Emerging data has suggested that a positive perception of the  
8  
9 104 school play environment was associated with higher levels of moderate-vigorous physical  
10  
11 105 activity (MVPA) during playtime.[13] Moreover, the number of permanent play facilities in  
12  
13 106 school playgrounds has been found to be associated with higher physical activity levels.[14]  
14  
15 107 A recent review [15] on the value of playgrounds for children’s physical activity identified 13  
16  
17 108 experimental studies, which have produced mixed findings, likely owing to differences in  
18  
19 109 intervention design. For example, the review identified that reducing playground density  
20  
21 110 increased physical activity levels, but the provision of play equipment produced mixed  
22  
23 111 effects, whereas no effects were found on the provision of playground markings and  
24  
25 112 promotion of physical activity by teachers. Just one study investigated the impact of “major”  
26  
27 113 playground reconstruction on children’s physical activity behaviour [16] and concluded  
28  
29 114 renovated schoolyards to promote physical activity may increase the number of children  
30  
31 115 who are physically active and may reduce sedentary behaviours. However, physical activity  
32  
33 116 data was collected using direct observation during the school day, only. This limits the ability  
34  
35 117 to examine carry over effects outside the school environment (ie, at weekends and during  
36  
37 118 evenings). Taken together, the emerging evidence suggests that the physical environment  
38  
39 119 could play an important role in children’s physical activity behaviour, but more robust  
40  
41 120 evidence is required.  
42  
43  
44  
45  
46  
47  
48  
49  
50

121

122 **Increasing physical activity levels is well established as a way to improve fitness and health**123 **outcomes in young people. Strong’s et al. [1] review identified 17 experimental studies that**

1  
2  
3 124 aimed to increase levels of physical activity, and these all found improvements in aerobic  
4  
5 125 fitness. Two experimental studies implemented programs of moderately intense exercise 30  
6  
7 126 to 60 minutes in duration, 3 to 7 days per week, and this led to a reduction in total body  
8  
9  
10 127 adiposity in overweight young people. Interestingly, the review also identified three  
11  
12 128 longitudinal and two experimental studies in young people that showed physical activity or  
13  
14  
15 129 strength training improved muscular strength and endurance. It is plausible to assume that  
16  
17 130 an increase in movement and a decrease in sedentary behaviour may result in an increase in  
18  
19 131 hamstring flexibility. This is important as maintaining hamstring flexibility may prevent acute  
20  
21  
22 132 and chronic musculoskeletal injuries.[17] There is also evidence that physical activity is  
23  
24 133 associated with scores on a scale (The Strengths and Difficulties Questionnaire) measuring  
25  
26 134 mental wellbeing (eg, happiness, behaviour, concentration, self-esteem etc).[18] On this  
27  
28 135 basis we hypothesise that a change in the physical school playground environment which  
29  
30  
31 136 increases levels of physical activity or reduces sedentary behaviour should subsequently  
32  
33  
34 137 improve fitness and health outcomes.  
35  
36  
37  
38  
39  
40 139 A recent study found that engaging in 40% of moderate-intensity physical activity during  
41  
42 140 school playtime equated to 34 minutes of daily MVPA.[19] This exceeds the *minimum*  
43  
44 141 recommendation of 30 minutes of at least moderate-intensity physical activity for children's  
45  
46  
47 142 good health.[20] It has been suggested that this guideline is a realistic target for children to  
48  
49 143 achieve during school playtime,[21] especially if a playground has been modified to  
50  
51  
52 144 encourage physical activity.  
53  
54  
55 145

1  
2  
3 146 **SETTING**  
4  
5

6 147 Camden Borough Council is re-designing seven existing school playgrounds (five primary schools and  
7  
8 148 two secondary schools), that are thought not to be conducive to physical activity/ active play, with  
9  
10 149 exciting bespoke features to engage children to become more active. Each school will receive a  
11  
12 150 unique playground design, for example displayed in Figure 1. Example features include new  
13  
14 151 Astroturf games pitches, climbing frames, trampolines, monkey bars, and outdoor gyms, which have  
15  
16 152 been designed based on themes (eg, ancient ruins, volcanoes, clouds etc.) emerging from qualitative  
17  
18 153 work with children and teachers in each school. The research team did not carry out the qualitative  
19  
20 154 work nor did they provide input into the design of the playgrounds. The qualitative work and the  
21  
22 155 design of the playgrounds were carried out by two private organisations specialising in playground  
23  
24 156 design. Camden Council's underlying goal is to encourage participation by creating  
25  
26 157 opportunities for physical activity outside of traditional sports or team competition. This  
27  
28 158 presents a unique opportunity to evaluate the impact of these structures on children's  
29  
30 159 physical activity, health and wellbeing outcomes while addressing previous limitations in the  
31  
32 160 literature (ie, collecting activity only in school).  
33  
34  
35  
36  
37  
38  
39  
40

41 162 We hypothesise that the new play grounds will increase young peoples' time spent in both light and  
42  
43 163 moderate-to-vigorous physical activity and reduce sedentary behaviour during break time, and  
44  
45 164 consequently improve levels of general fitness (eg, grip and leg strength, peak flow and adiposity).  
46  
47  
48

49 165

50  
51  
52 166 **AIMS**  
53  
54

55 167 The *Camden Active Spaces* project consists of two key elements; 1) redesign of the school  
56  
57 168 playgrounds; 2) evaluation of the hypothesised benefits. In the present paper we focus on  
58  
59  
60

1  
2  
3 169 the evaluation only. Thus, the primary aim of this project is to evaluate the impact of the re-  
4  
5 170 designed playgrounds on children's physical activity, wellbeing, and physical  
6  
7  
8 171 function/fitness.  
9

10  
11 172

## 14 173 **METHOD AND ANALYSES**

17 174 The evaluation of *Camden Active Spaces* will use a longitudinal quasi-experimental design.  
18  
19 175 Baseline data collection will take place in the Spring/Summer term 2014, follow-up I data  
20  
21 176 collection will take place during the Autumn term 2014, and follow-up II during the Summer  
22  
23 177 term of 2015 (see Figure 2). Between baseline and follow-up I (school summer holidays) the  
24  
25 178 school playgrounds will be re-designed. A second follow-up will allow us to investigate if  
26  
27 179 short-term effects of the intervention (if they exist) are sustained over a longer period. This  
28  
29 180 evaluation has been funded by the Economic and Social Research Council, UK  
30  
31 181 (ES/M003795/1), whilst the core project (playground redesign) has been funded by Camden  
32  
33 182 Clinical Commissioning Group and London Borough of Camden. Ethical approval was  
34  
35 183 granted by the University College London Research Ethics Committee (4400/002).  
36  
37  
38  
39

40  
41 184

### 44 185 **Inclusion criteria**

#### 46 186 *School inclusion criteria*

47  
48 187 Seven schools located in the London Borough of Camden have been selected to receive the  
49  
50 188 re-designed playgrounds and all seven schools have agreed to take part in the study.  
51  
52  
53  
54

55  
56 189  
57  
58  
59  
60

1  
2  
3 190 In addition to the seven experimental schools one control school will be recruited into the study.  
4  
5 191 This school will be located in the London Borough of Camden and it will not be receiving a new  
6  
7 192 playground design, moreover, it will not differ from experimental schools based on student  
8  
9 193 demographics or school policy. Owing to resources it is only feasible to collect data from a single  
10  
11 194 control school. The authors acknowledge that an equal number of controls to experimental schools  
12  
13 195 would allow for a more robust experimental design.

### 16 17 196 *Participant Inclusion criteria*

18  
19  
20 197 We aim to randomly select approximately 100 children (see below power calculation) evenly  
21  
22 198 distributed across school year groups (aged 5 to 11 years in primary school and aged 11 to  
23  
24 199 16 years in secondary school) from each of the eight schools (total sample size 800).  
25  
26  
27 200 Children aged 17 to 18 years or any school leavers in 2014 will not be asked to participate in  
28  
29 201 the current project, owing to time table restrictions due to final exams and potential loss to  
30  
31 202 follow up. Students whose parents have not opted them out of the study will be eligible to  
32  
33 203 participate (see section Ethics and Dissemination for details on obtaining consent).  
34  
35

36  
37 204

### 38 39 40 205 **Recruitment**

41  
42  
43 206 The seven schools who will be receiving the redesigned playgrounds have previously been  
44  
45 207 recruited into the study by Camden Borough Council. To recruit children into the study  
46  
47 208 presentations will be given to each year group within each school, during assemblies. The  
48  
49 209 presentations will disseminate information on *Camden Active Spaces*, what would be  
50  
51 210 involved if children were to take part in the study and benefits of the study to children and  
52  
53 211 the school. At the end of the presentations children will be given participant study  
54  
55 212 information sheets. In order to make parents aware of the study a parent information sheet  
56  
57  
58  
59  
60



1  
2  
3 213 will be emailed to all parents (translated into different languages where required), posted  
4  
5 214 on the school webpage, in addition to hard copies being made available at the school. In an  
6  
7 215 attempt to maximise response rates and adherence to protocol, each child who completes  
8  
9 216 the wear protocol will be awarded a one-month free swimming voucher and entered into a  
10  
11 217 prize draw to win an iPod Touch (one iPod Touch will be awarded per school). All schools  
12  
13 218 taking part in the study will be entered into a separate prize draw to win one of two  
14  
15 219 Nintendo Wiis.  
16  
17  
18  
19  
20  
21  
22  
23  
24

## 221 **Procedures**

222 Data collection procedures will take place over a period of 12 months. A team of trained  
223 researchers will collect data from each school on a date and time that is convenient for the  
224 school. Children will be invited to take part in data collection. Data collection sessions will  
225 last approximately 30 minutes. A series of fitness tests and anthropometric measurements  
226 will be carried out on children, in an appropriate room in the school (e.g. sports or assembly  
227 hall). Once fitness tests and anthropometric measurements have been completed objective  
228 devices (accelerometers) will be given to children to monitor their physical activity  
229 behaviour. Between four and seven days of accelerometer data are needed to provide a  
230 reliable estimate of habitual physical activity.[22] Thus participants will be asked to wear  
231 objective devices for 7 consecutive days. On day seven participants will return the device to  
232 research staff at the school where they will then complete a questionnaire on their physical  
233 activity behaviour. This exact process will be repeated at follow-up I and follow-up II.

234

1  
2  
3 235 **Measurement and instruments**  
4

5  
6 236 *Accelerometer*  
7

8  
9 237 It is now recognised that accelerometers provide the most reliable and valid measurement  
10  
11 238 of activity in children [16] and are considered the gold standard approach. These wearable  
12  
13 239 motion sensors measure movement across three dimensions, thus providing minute-by-  
14  
15 240 minute time-stamped data on activity intensity, duration, and patterns across the day.  
16  
17

18  
19 241 Objective physical activity monitoring has been successfully used in similar study settings to  
20  
21 242 the present project.[14,23, 24]  
22

23  
24 243 The present evaluation will use the Actigraph GT3X accelerometer. This device is validated  
25  
26 244 and has been used in other studies with primary and high school children (see for example:  
27  
28 245 [www.iconnect.co.uk](http://www.iconnect.co.uk) and <http://www.cedar.iph.cam.ac.uk/research/directory/speedy/>). The  
29  
30 246 Actigraph GT3X is worn on a belt around the waist with the device itself positioned above  
31  
32 247 the right hip either over or under clothing. We will employ a sampling frequency of 30 hz.  
33  
34 248 Children will be asked to wear the device during waking hours every day for seven  
35  
36 249 consecutive days, but not during water-based activities or sleep.  
37  
38  
39

40  
41 250  
42

43  
44  
45 251 *Fitness Tests*  
46

47  
48 252 A series of fitness tests will be carried out, following Standard Operating Procedure Forms,  
49  
50 253 on all children taking part in the study. Four fitness tests will be carried out to measure  
51  
52 254 aspects of general fitness: participants will be asked to perform the hand held  
53  
54 255 Dynamometer test to assess grip strength, the standing horizontal jump test to assess leg  
55  
56 256 power, the peak flow test to assess lung function, and the sit-and-reach test to assess  
57  
58  
59  
60

1  
2  
3 257 flexibility. Participants' weight and body composition will be measured using the Tanita SC-  
4  
5 258 330 Body Composition Analyser (Tanita Inc, IL, USA) and height will be measured using the  
6  
7  
8 259 Leicester Height Measure, from which BMI will be calculated  $\text{kg/m}^2$ . These tests have been  
9  
10 260 extensively used in previous cohort studies of young people (eg,  
11  
12 261 <http://www.chasestudy.ac.uk/study-measurement>) and have shown good validity and  
13  
14 262 reliability in young people across broad age groups (<http://www.chasestudy.ac.uk/study->  
15  
16 263 [measurement](http://www.chasestudy.ac.uk/study-measurement)). [25-27]

17  
18  
19  
20 264

### 21 22 23 265 *Questionnaires*

24  
25  
26 266 All children taking part in the study will be asked to complete a questionnaire. The  
27  
28 267 questionnaire will take approximately ten minutes to complete and includes questions on  
29  
30 268 standard demographics and physical activity, as well as potentially important correlates of  
31  
32 269 physical activity. Teaching assistants and research staff will assist all children in completing  
33  
34 270 questionnaires.

35  
36  
37  
38  
39 271 The Girls Health Enrichment Multi-Studies (GEMS) physical activity survey has been  
40  
41 272 embedded within the questionnaire to give a subjective measure of physical activity and  
42  
43 273 provide an understanding of which specific physical activity behaviours are influenced by  
44  
45 274 the playground redesign, if any. GEMS has validity and reliability equivalent to other self-  
46  
47 275 report measures of physical activity [28] and was deemed suitable for both primary and high  
48  
49 276 school boys and girls by those who designed the present study, owing to its simplicity. The  
50  
51 277 questionnaire also includes items on travel mode (as used in the iConnect Study;  
52  
53 278 [www.icconnect.co.uk](http://www.icconnect.co.uk)).

1  
2  
3 279 Teachers will be asked to complete the validated Strengths and Difficulties  
4  
5 280 questionnaire;<sup>[29]</sup> this questionnaire provides a measure of children's behaviour, mental  
6  
7 281 health, engagement and well-being and takes approximately five minutes to complete per  
8  
9  
10 282 child.  
11  
12  
13 283 Each school has one Head Teacher. Head Teachers (n=8) will be asked to complete a  
14  
15 284 questionnaire to allow for an understanding of differences between schools on "playground  
16  
17 285 policy." Questions include, "During what type of weather are children not allowed to go  
18  
19 286 outside during scheduled breaks (i.e. rain/ snow)?" "Are any sections of the current  
20  
21 287 playground out of use during bad weather (i.e. school field when raining), if yes please  
22  
23 288 specify?" "When children cannot go outside on scheduled breaks, owing to bad weather,  
24  
25 289 where do they spend their break?" and "Are there any current initiatives/programs to  
26  
27 290 promote physical activity and/or healthy lifestyles in your school, if yes please specify?"  
28  
29  
30 291 Head teachers will be asked to complete an identical survey at follow-up to allow for the  
31  
32 292 assessment of changes in "playground policy" between each time point.  
33  
34  
35  
36  
37  
38  
39  
40  
41  
42  
43  
44  
45  
46  
47  
48  
49  
50  
51  
52  
53  
54  
55  
56  
57  
58  
59  
60

293

## 294 **ANALYSIS**

### 295 *Outcome*

296 The primary outcome for this study will be change in average daily time spent in MVPA as  
297 recorded by the Actigraph accelerometer. In addition the study has been designed to collect  
298 the following secondary outcomes using participant questionnaires and objective measures  
299 (1) change in average daily time spent sedentary, (2) change in average daily time spent in  
300 light and vigorous activity at different times of the day (playtimes at school, leisure time at

1  
2  
3 301 home), (3) change in peak flow, sit-and-reach, grip strength, standing horizontal jump, and  
4  
5 302 body mass index (BMI)/body composition, (4) change in Strength and Difficulties scores.  
6  
7  
8  
9 303

10  
11 304 *Quantitative analysis*  
12

13  
14  
15 305 Raw data files will be extracted from each Actigraph device and processed using bespoke  
16  
17 306 software (Actilife) to quantify a range of features that will directly contribute to the  
18  
19 307 determination of active and sedentary time. We intend to follow methods used in the  
20  
21 308 International Children's Accelerometry Database study that incorporated children aged 4-18  
22  
23 309 yrs old [2]. Briefly, data files will be reintegrated to a 60-second epoch and non-wear time  
24  
25 310 defined as 60 minutes of consecutive zeros, allowing for 2 minutes of non-zero  
26  
27 311 interruptions. All children with at least 1 day with at least 500 minutes of measured monitor  
28  
29 312 wear time between 7 AM and midnight will be included. Total physical activity will be  
30  
31 313 expressed as total counts, including sedentary minutes, divided by measured time per day  
32  
33 314 (counts/min, cpm). Time spent sedentary will be defined as all minutes showing less than  
34  
35 315 100 cpm and MVPA time as minutes showing more than 3000 cpm. Multilevel modelling will  
36  
37 316 be used to analyse the data. This approach offers several advantages over simple regression  
38  
39 317 models. We will be able to model changes in activity over the three assessment periods  
40  
41 318 accounting for the inter-individual as well as intra-individual differences.  
42  
43  
44  
45  
46  
47  
48  
49  
50  
51

52 320 *Sample size*  
53  
54

55 321 A previous school based intervention to examine the effects of changes in playground  
56  
57 322 structure on physical activity [23] demonstrated a small effect size ( $d = 0.10$ ). Thus, based on  
58  
59  
60

1  
2  
3 323 these data, a sample size of N=458 would provide us with 80% power at 5% significance  
4  
5 324 level to detect small differences in moderate intensity physical activity using a repeated  
6  
7 325 measures design (calculated using G-Power). We will aim to recruit 100 children from each  
8  
9  
10 326 school to allow for dropout and incomplete Actigraph data.  
11  
12  
13  
14 327  
15  
16

## 17 328 **LIMITATIONS**

18  
19 329  
20  
21 330 It is not possible to carry out a multicentre cluster randomised-controlled-trial. Key limitations of this  
22  
23 331 study include a quasi-experimental design with non-randomly selected control participants and the  
24  
25 332 recruitment of one control school.  
26  
27  
28  
29 333  
30  
31

## 32 334 **ETHICAL CONSIDERATION AND DISSEMINATION**

33  
34  
35 335 Firstly, head teachers from each school will be asked to provide explicit written consent for  
36  
37 336 their schools and school children to take part in the study. Next, if parents (of primary and  
38  
39 337 secondary school children) do not want their child(ren) to take part in the study they will be  
40  
41  
42 338 given the option to “opt-out” their child(ren), instructions to parents on how to opt-out  
43  
44 339 their child(ren) are provided in the parent study information sheet. Prior to data collection  
45  
46 340 all high school (not primary school) children will be asked to provide explicit written assent.  
47  
48

49  
50 341 The findings from this study will be disseminated to academic researchers and to  
51  
52 342 policymakers through several mechanisms. First, we will employ the usual avenues for  
53  
54 343 dissemination of academic research, including conference presentations and journal  
55  
56 344 articles. Second, we will disseminate this research via social media outlets such as the  
57  
58  
59  
60

1  
2  
3 345 University College London – Physical Activity Research Group Twitter account. Third, with  
4  
5 346 Camden Council, we will include this physical activity study within the regular programme of  
6  
7 347 briefings that are presented to government departments interested in physical activity,  
8  
9 348 including the Department of Health, the Department for Communities and Local  
10  
11 349 Government, etc.  
12  
13  
14  
15  
16  
17  
18  
19 350

### 20 351 **Competing interests**

21  
22 352 The authors declare that they have no competing interests.  
23  
24

### 25 353 **Funding**

26  
27  
28 354 This work was supported by The Economic and Social Research Council, UK (ES/M003795/1)  
29  
30

### 31 355 **Authors' contributions**

32  
33  
34 356 Lee Smith, Courtney Kipps, Daniel Aggio, Paul Fox, Nigel Robinson, Verena Trend, Suzie  
35  
36 357 Munnery, Barry Kelly, and Mark Hamer made substantial contribution to the concept and  
37  
38 358 design of the study. Lee Smith drafted the manuscript and Courtney Kipps, Daniel Aggio,  
39  
40 359 Paul Fox, Nigel Robinson, Verena Trend, Suzie Munnery, Barry Kelly, and Mark Hamer  
41  
42 360 revised it critically for important intellectual content. Lee Smith, Courtney Kipps, Daniel  
43  
44 361 Aggio, Paul Fox, Nigel Robinson, Verena Trend, Suzie Munnery, Barry Kelly, and Mark Hamer  
45  
46 362 approved the final version of the manuscript to be published.  
47  
48  
49  
50

51 363  
52  
53  
54

55 364  
56  
57  
58  
59  
60

1  
2  
3  
4  
5  
6  
7  
8  
9  
10  
11  
12  
13  
14  
15  
16  
17  
18  
19  
20  
21  
22  
23  
24  
25  
26  
27  
28  
29  
30  
31  
32  
33  
34  
35  
36  
37  
38  
39  
40  
41  
42  
43  
44  
45  
46  
47  
48  
49  
50  
51  
52  
53  
54  
55  
56  
57  
58  
59  
60

365 **Figure Legends**

366 **Figure 1: Example of new playground designs**

367 **Figure 2: Overview of study design**

368

369

370

371

372

373

374

375

376

377

378

379

380

381

382

For peer review only



## 383 REFERENCES

- 384 1. Strong WB, Malina RM, Blimkie CJR, et al. Evidence based physical activity for school-age youth. *J*  
385 *Pediatr-Us* 2005;146(6):732-37.
- 386 2. Ekelund U, Luan JA, Sherar LB, et al. Moderate to Vigorous Physical Activity and Sedentary Time  
387 and Cardiometabolic Risk Factors in Children and Adolescents. *Jama-J Am Med Assoc*  
388 2012;307(7):704-12.
- 389 3. Centre for Diseases and Control Prevention. Physical Activity and Health. Atlanta, US.  
390 2013.
- 391 4. Lees C, Hopkins J. Effect of Aerobic Exercise on Cognition, Academic Achievement, and  
392 Psychosocial Function in Children: A Systematic Review of Randomized Control Trials.  
393 *Preventing Chronic Disease* 2013;10.
- 394 5. Telama R, Yang X, Viikari J, et al. Physical activity from childhood to adulthood: a 21-year tracking  
395 study. *American journal of preventive medicine* 2005;28(3):267-73.
- 396 6. Griffiths LJ, Cortina-Borja M, Sera F, et al. How active are our children? Findings from the  
397 Millennium Cohort Study. *BMJ open* 2013;3(8).
- 398 7. Joint Health Surveys Unit. The Health Survey for England 2008. The Information Centre for Health  
399 and Social Care, 2009, Leeds. [www.ic.nhs.uk/pubs/hse08physicalactivity](http://www.ic.nhs.uk/pubs/hse08physicalactivity)
- 400 8. Department of Health. Start Active Stay Active: A report on physical activity for health from the  
401 four home countries' Chief Medical Officers (UK). July 2011.
- 402 9. Metcalf B, Henley W, Wilkin T. Effectiveness of intervention on physical activity of children:  
403 systematic review and meta-analysis of controlled trials with objectively measured  
404 outcomes. *British Journal of Sports Medicine* 2013;47(4):226-26.
- 405 10. Smith L, Sahlqvist S, Ogilvie D, et al. Is active travel to non-school destinations associated with  
406 physical activity in primary school children? *Preventive medicine* 2012;54(3-4):224-28.
- 407 11. Nettlefold L, McKay HA, Warburton DER. The challenge of low physical activity during the school  
408 day: at recess, lunch and in physical education. *British Journal of Sports Medicine*  
409 2011;45(10):819-19.
- 410 12. Fisher A, van Jaarsveld CHM, Llewellyn CH, et al. Environmental Influences on Children's Physical  
411 Activity: Quantitative Estimates Using a Twin Design. *PloS one* 2010;5(4).
- 412 13. Yildirim M, Arundell L, Cerin E, et al. What helps children to move more at school recess and  
413 lunchtime? Mid-intervention results from Transform-Us! cluster-randomised controlled trial.  
414 *British Journal of Sports Medicine* 2014;48(3):271-77.
- 415 14. Taylor R, Farmer V, Cameron S, et al. School playgrounds and physical activity policies as  
416 predictors of school and home activity. *Int Jr Behav Nutr Phys Act* 2011; 8(1):38.
- 417 15. Broekhuizen K, Scholten A, de Vries S. The value of (pre)school playgrounds for children's  
418 physical activity level: a systematic review. *Int Jr Behav Nutr Phys Act* 2014; 11:59.
- 419 16. Brink L, Nigg C, Lampe S, et al. Influence of schoolyard renovation on children's physical activity:  
420 The learning landscape Program. *Research and Practice* 2010; 100(9): 1672-78.
- 421 17. ACSM. Guidelines for exercise testing and percription. 6<sup>th</sup> ed. Baltimore. Lippincott, Williams and  
422 Wilkins, 2000: 85-8.
- 423 18. Brodersen N, Steptoe A, Williamson S, et al. Sociodemographic, developmental, environmental,  
424 and psychological correlates of physical activity and sedentary behaviour at age 11 to 12.  
425 *Ann Behav Med* 2005; 29(1): 2-11.
- 426 19. Ridgers N, Stratton G, Fairclough S. Assessing physical activity during recess using accelerometry.  
427 *Prev Med* 2005; 41(1): 102-7.
- 428 20. Biddle S, Sallis J, Cavill N (Eds). *Yound and active: physical activity guidelines for young people in*  
429 *the UK*, Health Education Authority, London 1998.
- 430 21. Ridgers N, Stratton G, Fairclough S. Physical activity levels of children during school play time.  
431 *Sports Medicine* 2006; 36(4): 359-371.

- 1  
2  
3 432 22. Corder K, Brage S, Ekelund U. Accelerometers and pedometers: methodology and clinical  
4 433 application. *Curr Opin Clin Nutr* 2007;10(5):597-603.  
5 434 23. Blaes A, Ridgers ND, Aucouturier J, et al. Effects of a playground marking intervention on school  
6 435 recess physical activity in French children. *Preventive medicine* 2013;57(5):580-4.  
7 436 24. Smith L, Sahlqvist S, Ogilvie D, et al. Is a change in mode of travel to school associated with a  
8 437 change in overall physical activity levels in children? Longitudinal results from the SPEEDY  
9 438 study. *Int J Behav Nutr Phy* 2012;9.  
10 439 25. Ruiz J, Castro-Pinero J, Espana-Romero, et al. Field-based fitness assessment in young people:  
11 440 the ALPHA health-related fitness test battery for children and adolescent. *British Journal of*  
12 441 *Sports Medicine* 2011; 45(6): 518-25.  
13 442 26. Ortega F, Artero E, Ruiz J, et al. Reliability of health-related physical fitness tests in European  
14 443 adolescents. *The HELENA Study. International Journal of Obesity* 2008; 32:49-57.  
15 444 27. Kirkby J, Welsh L, Lums S, et al. The EPICure study: comparison of pediatric spirometry in  
16 445 community and laboratory settings. *Pediatric pulmonology* 2008; 43(12): 1233-41.  
17 446 28. Treuth MS, Sherwood NE, Butte NF, et al. Validity and reliability of activity measures in African-  
18 447 American girls for GEMS. *Med Sci Sports Exerc* 2003;35(3):532-9.  
19 448 29. Goodman R. Psychometric properties of the strengths and difficulties questionnaire. *Journal of*  
20 449 *the American Academy of Child and Adolescent Psychiatry* 2001;40(11):1337-45.  
21  
22  
23 450  
24  
25 451  
26  
27  
28 452  
29  
30  
31  
32  
33  
34  
35  
36  
37  
38  
39  
40  
41  
42  
43  
44  
45  
46  
47  
48  
49  
50  
51  
52  
53  
54  
55  
56  
57  
58  
59  
60

Figure 1: Example of new playground designs

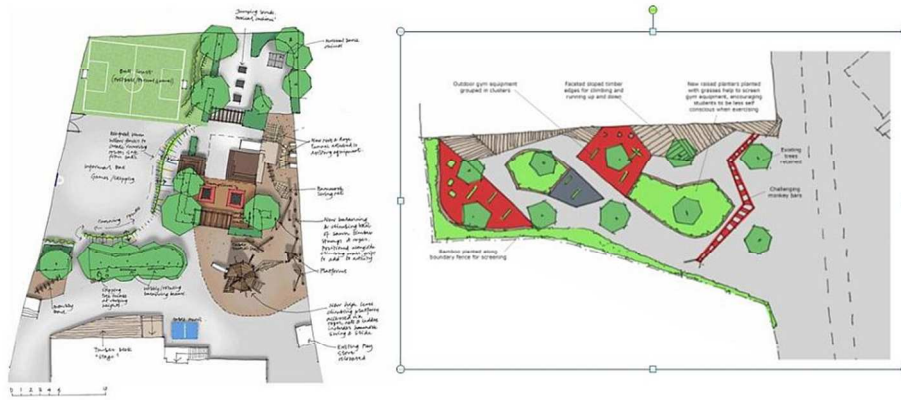

90x49mm (300 x 300 DPI)

review only

1  
2  
3  
4  
5  
6  
7  
8  
9  
10  
11  
12  
13  
14  
15  
16  
17  
18  
19  
20  
21  
22  
23  
24  
25  
26  
27  
28  
29  
30  
31  
32  
33  
34  
35  
36  
37  
38  
39  
40  
41  
42  
43  
44  
45  
46  
47  
48  
49  
50  
51  
52  
53  
54  
55  
56  
57  
58  
59  
60

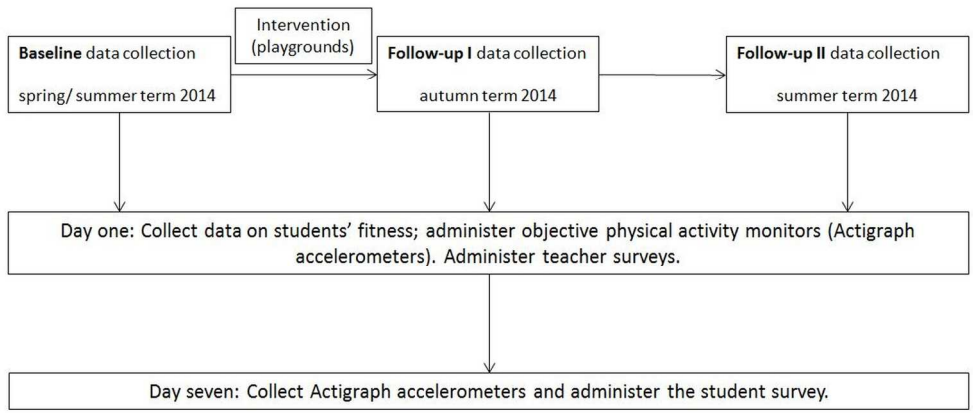

193x90mm (300 x 300 DPI)

er review only

## STROBE Statement—checklist of items that should be included in reports of observational studies

|                              | Item No | Recommendation                                                                                                                                                                                                                                                                                                                    |
|------------------------------|---------|-----------------------------------------------------------------------------------------------------------------------------------------------------------------------------------------------------------------------------------------------------------------------------------------------------------------------------------|
| Title and abstract           | 1       | (a) Indicate the study's design with a commonly used term in the title or the abstract<br><b>YES</b>                                                                                                                                                                                                                              |
|                              |         | (b) Provide in the abstract an informative and balanced summary of what was done and what was found<br><b>YES</b>                                                                                                                                                                                                                 |
| <b>Introduction</b>          |         |                                                                                                                                                                                                                                                                                                                                   |
| Background/rationale         | 2       | Explain the scientific background and rationale for the investigation being reported<br><b>YES</b>                                                                                                                                                                                                                                |
| Objectives                   | 3       | State specific objectives, including any prespecified hypotheses<br><b>YES</b>                                                                                                                                                                                                                                                    |
| <b>Methods</b>               |         |                                                                                                                                                                                                                                                                                                                                   |
| Study design                 | 4       | Present key elements of study design early in the paper<br><b>YES</b>                                                                                                                                                                                                                                                             |
| Setting                      | 5       | Describe the setting, locations, and relevant dates, including periods of recruitment, exposure, follow-up, and data collection<br><b>YES</b>                                                                                                                                                                                     |
| Participants                 | 6       | (a) <i>Cohort study</i> —Give the eligibility criteria, and the sources and methods of selection of participants. Describe methods of follow-up<br><b>YES</b>                                                                                                                                                                     |
|                              |         | <i>Case-control study</i> —Give the eligibility criteria, and the sources and methods of case ascertainment and control selection. Give the rationale for the choice of cases and controls<br><i>Cross-sectional study</i> —Give the eligibility criteria, and the sources and methods of selection of participants<br><b>YES</b> |
|                              |         | (b) <i>Cohort study</i> —For matched studies, give matching criteria and number of exposed and unexposed<br><i>Case-control study</i> —For matched studies, give matching criteria and the number of controls per case<br><b>NA</b>                                                                                               |
|                              |         |                                                                                                                                                                                                                                                                                                                                   |
| Variables                    | 7       | Clearly define all outcomes, exposures, predictors, potential confounders, and effect modifiers. Give diagnostic criteria, if applicable<br><b>YES</b>                                                                                                                                                                            |
| Data sources/<br>measurement | 8*      | For each variable of interest, give sources of data and details of methods of assessment (measurement). Describe comparability of assessment methods if there is more than one group<br><b>YES</b>                                                                                                                                |
| Bias                         | 9       | Describe any efforts to address potential sources of bias<br><b>YES</b>                                                                                                                                                                                                                                                           |
| Study size                   | 10      | Explain how the study size was arrived at<br><b>YES</b>                                                                                                                                                                                                                                                                           |
| Quantitative variables       | 11      | Explain how quantitative variables were handled in the analyses. If applicable, describe which groupings were chosen and why<br><b>YES</b>                                                                                                                                                                                        |

Statistical methods

12 (a) Describe all statistical methods, including those used to control for confounding

---

**YES**

---

(b) Describe any methods used to examine subgroups and interactions

---

**NA**

---

(c) Explain how missing data were addressed

---

**NA**

---

(d) *Cohort study*—If applicable, explain how loss to follow-up was addressed*Case-control study*—If applicable, explain how matching of cases and controls was addressed*Cross-sectional study*—If applicable, describe analytical methods taking account of sampling strategy

---

**NA**

---

(e) Describe any sensitivity analyses

Continued on next page

For peer review only

**Results**

|                   |     |                                                                                                                                                                                                              |     |
|-------------------|-----|--------------------------------------------------------------------------------------------------------------------------------------------------------------------------------------------------------------|-----|
| Participants      | 13* | (a) Report numbers of individuals at each stage of study—eg numbers potentially eligible, examined for eligibility, confirmed eligible, included in the study, completing follow-up, and analysed            | NA  |
|                   |     | (b) Give reasons for non-participation at each stage                                                                                                                                                         | NA  |
|                   |     | (c) Consider use of a flow diagram                                                                                                                                                                           | NA  |
| Descriptive data  | 14* | (a) Give characteristics of study participants (eg demographic, clinical, social) and information on exposures and potential confounders                                                                     | NA  |
|                   |     | (b) Indicate number of participants with missing data for each variable of interest                                                                                                                          | NA  |
|                   |     | (c) <i>Cohort study</i> —Summarise follow-up time (eg, average and total amount)                                                                                                                             | YES |
| Outcome data      | 15* | <i>Cohort study</i> —Report numbers of outcome events or summary measures over time                                                                                                                          | NA  |
|                   |     | <i>Case-control study</i> —Report numbers in each exposure category, or summary measures of exposure                                                                                                         | NA  |
|                   |     | <i>Cross-sectional study</i> —Report numbers of outcome events or summary measures                                                                                                                           | NA  |
| Main results      | 16  | (a) Give unadjusted estimates and, if applicable, confounder-adjusted estimates and their precision (eg, 95% confidence interval). Make clear which confounders were adjusted for and why they were included | NA  |
|                   |     | (b) Report category boundaries when continuous variables were categorized                                                                                                                                    | NA  |
|                   |     | (c) If relevant, consider translating estimates of relative risk into absolute risk for a meaningful time period                                                                                             | NA  |
| Other analyses    | 17  | Report other analyses done—eg analyses of subgroups and interactions, and sensitivity analyses                                                                                                               | NA  |
| <b>Discussion</b> |     |                                                                                                                                                                                                              |     |
| Key results       | 18  | Summarise key results with reference to study objectives                                                                                                                                                     | NA  |
| Limitations       | 19  | Discuss limitations of the study, taking into account sources of potential bias or imprecision. Discuss both direction and magnitude of any potential bias                                                   | YES |
| Interpretation    | 20  | Give a cautious overall interpretation of results considering objectives, limitations, multiplicity of analyses, results from similar studies, and other relevant evidence                                   | NA  |
| Generalisability  | 21  | Discuss the generalisability (external validity) of the study results                                                                                                                                        | NA  |

**Other information**

---

Funding 22 Give the source of funding and the role of the funders for the present study and, if applicable, for the original study on which the present article is based

**YES**

\*Give information separately for cases and controls in case-control studies and, if applicable, for exposed and unexposed groups in cohort and cross-sectional studies.

**Note:** An Explanation and Elaboration article discusses each checklist item and gives methodological background and published examples of transparent reporting. The STROBE checklist is best used in conjunction with this article (freely available on the Web sites of PLoS Medicine at <http://www.plosmedicine.org/>, Annals of Internal Medicine at <http://www.annals.org/>, and Epidemiology at <http://www.epidem.com/>). Information on the STROBE Initiative is available at [www.strobe-statement.org](http://www.strobe-statement.org).
